# Supplementary material
Source: publisher figshare collection journal article supplement (https://gsapubs.figshare.com/articles/dataset/_/21824805)
Supplement: Supplementary file 1 [file 1]

## Slab window related magmatism as a probe for lithological variability in the upper mantle.

Malcolm J. Hole<sup>1</sup>, Sally, A. Gibson<sup>2</sup>, Matthew C. Morris<sup>2</sup>.

### 1. Melt-PX parameters

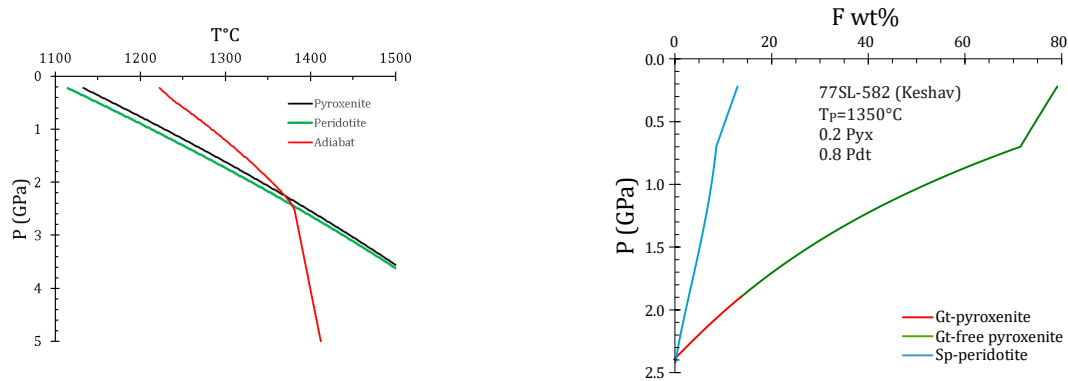

Fig. S.1. a) Pressure vs temperature and b) pressure vs % melt ( $F$ ) diagram generated from Melt-PX for pyroxenite 77SL-582 (Keshav et al. 2004). The red and green curves in b) represent garnet-pyroxenite and garnet-free pyroxenite melting respectively. These curves are combined and used to calculate melt productivity  $\text{GPa}^{-1}$  in accumulated melt fraction models. Configuration is;  $T_P=1350^\circ\text{C}$ ; fraction of pyroxenite=0.2; mass fraction of clinopyroxene present in sub-solidus peridotite=0.24.

Our accumulated fractional melting model is based upon 1% increments of melting. We derive the pressure of melting for pyroxenite from a polynomial regression of the green line in Fig. S.1b over the pressure range of 2.33-0.70 GPa;

$$P=0.00019F^2+0.03623F+2.36759$$

Where  $F$  is % of melt.

Over the pressure range of interest (2.2-0.5 GPa),  $P$ - $F$  is near linear for peridotite and we use the following equation;

$$P=-0.1861F+2.4267$$

### 2. Accumulated fractional melting model

#### a. Starting compositions.

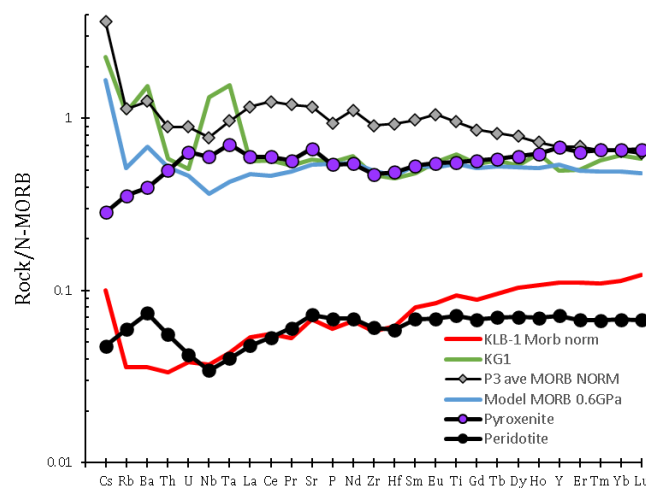

Fig. S.2. MORB-normalized multi-element plot for the model components used in this paper along with measured values for KLB-1, KG1 and Phoenix Ridge segment P3 N-MORB. The blue line is a calculated model peridotite melt at a final melting pressure of  $\sim 0.6$  GPa. Normalisation factors are from Sun & McDonough (1989)

MORB mantle-normalized abundances of trace elements in the starting compositions are shown in Fig. S.2 and listed in Table S.1. The pyroxenite compositions is based on KG1 (Lambart, 2017) but lacks the large positive Nb, Ta anomaly, because this is not a feature of most ocean ridge basalts. The peridotite composition is based on KLB-1 (Lambart, 2017) but is slightly less depleted reflecting the composition of Phoenix Ridge N-MORB (grey diamonds in Fig. S.2). Calculated accumulated fractional melts of peridotite at 0.6 GPa are a good match to the pattern of Phoenix Ridge MORB.

### b. Accumulated fractional melting.

Standard equations for mantle melting (Shaw, 1970) have been applied to calculate the concentrations of trace elements

For the concentration of a given element in the liquid ( $C_l$ );  $\frac{C_l}{C_0} = \frac{1}{D_0} (1 - PF/D_0)^{\frac{1}{F-1}}$

And for the concentration of a given element in the solid ( $C_s$ );  $\frac{C_s}{C_0} = \frac{1}{(1-F)} (1 - PF/D_0)^{\frac{1}{F}}$

Where  $D_0$  is the bulk partition coefficient,  $F$  is the melt fraction and  $P$  is the melting proportion

### c. Partition coefficients

Partition coefficients are given in Tables S.1 & S.2 along with mineral modes used in the calculations. Partition coefficients for melting of MORB are those of McKenzie and O'Nions (1991), with additional data for transition elements from LeRoux *et al.* (2015). For pyroxenite we use data from Petermann *et al.* (2004) and LeRoux *et al.* (2015). While the values from Petermann *et al.* (2004) are for silica-deficient pyroxenite i.e. a MORB eclogite, we assume that for the elements shown in Fig. S.1 these are applicable. However, we are guarded in applying the very high  $D_{Ni}$  and  $D_{Cr}$  of Petermann *et al.* (2004) to a silica-deficient pyroxenite. Fig. S.3 summarizes the bulk partition coefficients used in our model.

As we are mostly interested in the composition of small melt fractions, we have assumed the melting mode does not vary during melting. This is an oversimplification but for melting garnet pyroxenite it is the pressure at which garnet is no longer stable on the solidus that is more critical to the model than changing mode for garnet-present melting.

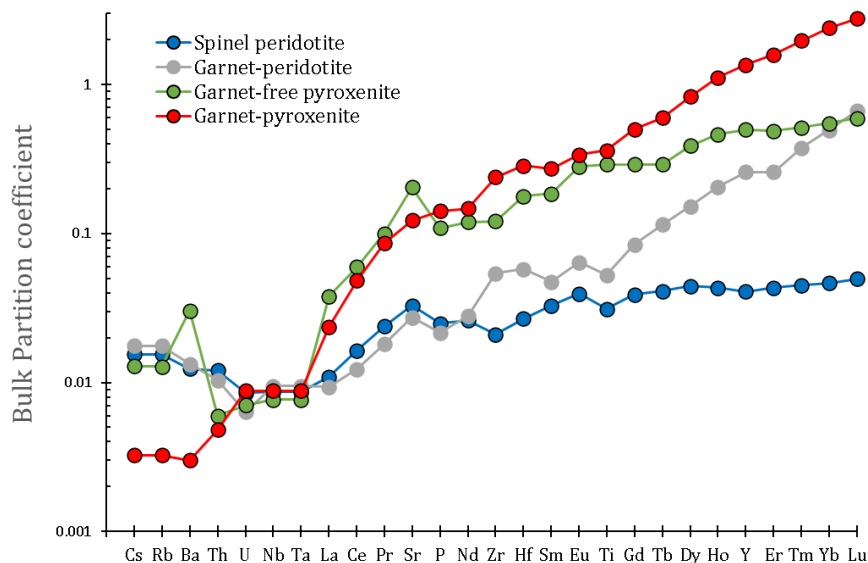

Fig. S.3 Log-plot of bulk partition coefficients used in the model. The data for garnet peridotite is for reference and is not utilized in the current model. Note that

bulk partition coefficients are generally much higher for MORB-like eclogite when compared to garnet peridotite (Pertermann *et al.* 2004) except for elements more incompatible than La.

#### **d. First-formed melts of peridotite and pyroxenite melting in terms of $10^4\text{Zn/Fe}$ and $100\text{Mn/Fe}$**

For calculating the first formed melt on the  $10^4\text{Zn/Fe}$  and  $100\text{Mn/Fe}$  diagram at  $T_P=1350^\circ\text{C}$ , we use a model MORB primary magma from the Siqueiros Fracture Zone from Herzberg & Asimow (2015) which contains 11.56 wt.% MgO and 8.17 wt.%  $\text{FeO}_T$  and represents  $\sim 9\%$  melt. For smaller melt fractions, we assume that the melting trajectory is coincident with the olivine liquidus and adjust  $\text{FeO}_T$  and MgO accordingly. From the MgO and  $\text{FeO}_T$  of the melt we calculate the Fo content of equilibrium olivine and from that value the cation proportion of Fe and Mg in olivine and hence the FeO content of olivine. We assume  $\text{FeO/FeO}_T=0.88$  (Herzberg & Asimow, 2015) equivalent to QFM-1. To obtain  $k_D\text{Mn}$  we calculate  $D_{\text{MgO}}$  from the model magma and its equilibrium olivine and use the Herzberg & O'Hara (2002) expression:

$$k_D\text{Mn}=0.118D_{\text{MgO}}+0.214$$

For the first formed peridotite melts on the same diagram at  $1500^\circ\text{C}$  and  $1550^\circ\text{C}$  we use the following:

$T_P 1500^\circ\text{C}$ ; Hawaiian post-shield magma 0622-6.  $F=2.4\%$  and 17.6 wt.% MgO, 10.7 wt.%  $\text{FeO}_T$

$T_P 1550^\circ\text{C}$ ; Disko Island picrite 362077.  $F=7.8\%$  and 19.8 wt.% MgO, 11.3 wt.%  $\text{FeO}_T$

Both model primary magmas are from Hole & Millet (2016).

For the  $T_P=1350^\circ\text{C}$  melting trajectory for pyroxenite we use the parental magma to Seal Nunataks lava R.3717.1 (14.1 wt.% MgO; 10.9 wt.%  $\text{FeO}_T$ ) and assume it was formed by  $\sim 10\%$  melting at 1.9 GPa.

### 3. Relationship between pyroxenite bulk composition, $P_i^{\text{Pyx}}$ and $P_i^{\text{Pdt}}$

Lambart et al. (2016) express pyroxenite compositions as;

$$(1-\text{Mg\#}) + 10(\text{Na} + \text{K}) - \text{Ca} + \text{Al}$$

Where; Mg# is the molar ratio  $\text{MgO}/(\text{MgO} + \text{FeO})$  and Na, K, Ca, and Al are the mole fractions of  $\text{Na}_2\text{O}$ ,  $\text{K}_2\text{O}$ ,  $\text{CaO}$ , and  $\text{Al}_2\text{O}_3$ .

Figure S.4 shows the relationship between alkalinity index and pressure and extent of melting for silica-enriched and silica-depleted pyroxenite. In general, silica-enriched pyroxenite will melt at a higher pressure than silica-depleted pyroxenite for a given  $T_P$  (Fig. S.4a), but this is critically dependent on the non CMAS components i.e. alkalis and Ti (Lambart et al., 2013). This can be translated into the extent of melting of pyroxenite before peridotite joins the melting assemblage ( $F@P_i^{\text{Pdt}}$ ; Fig. S.4b). For most silica-depleted pyroxenite at  $T_P=1350^\circ\text{C}$  <13% melting will occur before peridotite begins to melt, whereas for most silica-enriched pyroxenite,  $F$  is >26%. Therefore, to enable mixing between small fraction melts of peridotite and small fraction melts of pyroxenite,  $F@P_i^{\text{Pdt}}$  needs to be minimal. Pyroxenite 77SL-582 as used in this study (red dot in Fig. S.4) falls into that category.

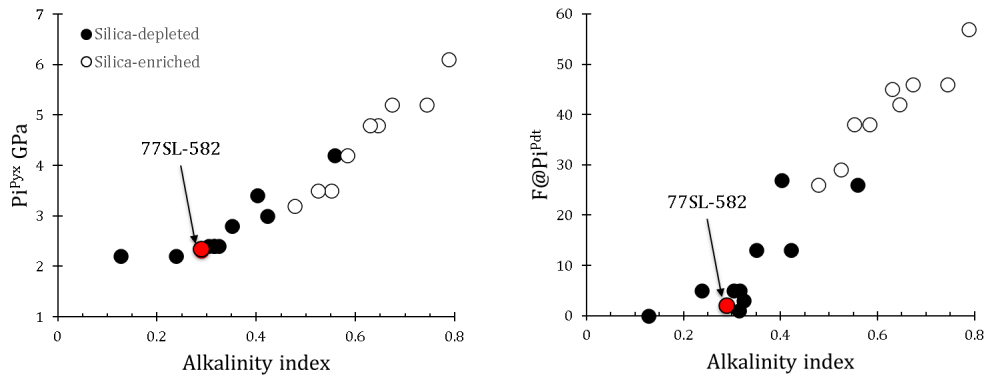

Fig S.4 a) Initial pressure of melting at  $T_P=1350^\circ\text{C}$  versus alkalinity index of pyroxenite. Black dots are silica-depleted and white dots silica-enriched pyroxenites. b) Extent of melting of pyroxenite ( $F$ , wt.%) at the point at which peridotite joins the melting assemblage ( $F@P_i^{\text{Pdt}}$ ) at  $T_P=1350^\circ\text{C}$  versus alkalinity index. The red dot is for 77SL-582. The data point on the x-axis with alkalinity index  $\sim 0.13$  is an olivine pyroxenite (Olcpx1; Lambart *et al.*, 2016).

#### 4. Calculation of parental pyroxenite magma compositions.

Full details of the process are given by Herzberg (2011) and Hole (2021). Firstly, it is necessary to determine whether lava compositions are consistent with the crystallization of olivine alone. This can be done using major element compositions and with petrographic observation. We restrict the parental magma calculations to samples that have only olivine as a phenocryst phase and show no evidence of plagioclase fractionation in terms of  $\text{MgO-CaO-Al}_2\text{O}_3$  variations. Selected samples are then recalculated as mole% and the projection coordinates given by Herzberg (2011) are calculated. Data are then plotted on the CS-A-MS (Diopside-Anorthite-Enstatite) diagram (Fig. S.5a). Isobaric cotectics are be calculated from:

$$A (\text{Anorthite}) = 20.188 - 5.2595P + 0.27P^2 + 0.5389CS \quad (\text{Herzberg, 2011})$$

Which yields a pressure of melting in GPa. Equilibrium olivine is then incrementally (0.5% increments) added back into the lava composition until the composition reaches the equivalent pressure cotectic in the Ol-CaTs-Qz projection (Fig. S.5b).

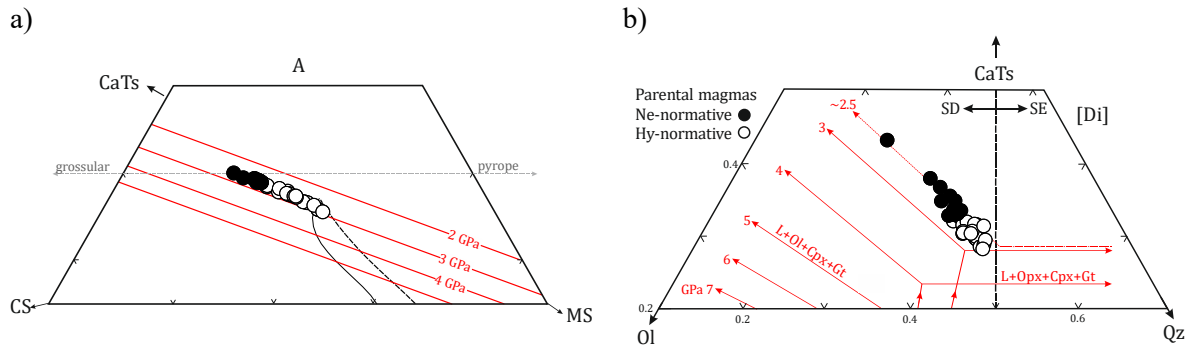

Fig. S.5 a) Molecular projection from or towards olivine onto the plane CS–MS–A (diopside–enstatite–anorthite) for Seal Nunataks parental pyroxenite-derived magmas (black dots). This projection is a larger portion of the garnet–pyroxene plane shown in b), and because the projection is from or towards olivine, olivine fractionation has no effect on the position of individual data points. The black curve separates olivine (to the left) and quartz (to the right) pyroxenite and the pecked curve represents the thermal divide at magma generation pressures, such that magmas to the right and left of the divide have divergent fractionation histories. b) Molecular projection from or toward diopside onto the plane olivine–calcium Tschermak’s molecule–quartz for Seal Nunataks parental pyroxenite-derived magmas divided by CIPW normative characteristics (black dots *Ne*-normative; white dots *Hy*-normative). Parental compositions were calculated by adding equilibrium olivine to lavas that are related to the olivine liquidus until they reach the cotectic for the pressure indicated by their position in the projection in a), that is between 2.5 and 3.0 GPa. The vertical pecked line separates silica-deficient and silica-enriched (SD and SE, respectively) at 1 atm.

## References cited

- Herzberg, C., 2011. Identification of source lithology in the Hawaiian and Canary Islands: implications for origins. *J Petrol.* 52, 113-146.
- Herzberg, C., O'Hara, M.J. 2002. Plume-associated ultramafic magmas of Phanerozoic age. *J. Petrol.* 43, 1857-1883.
- Herzberg, C., Asimow, P.D., 2015. PRIMELT3 MEGA.XLSM software for primary magma calculation: Peridotite primary magma MgO contents from the liquidus to the solidus. *Geochem. Geophys. Geosys.* 16, 563-578.
- Hole, M.J., 2021, Antarctic Peninsula: petrology. Chapter 4.1b. From: Smellie, J. L., Panter, K. S. and Geyer, A. (eds) *Volcanism in Antarctica: 200 million years of Subduction, Rifting and Continental Break-up*: Geological Society, London, Memoirs, 55. <https://doi.org/10.1144/M55-2018-40>.
- Hole, M.J. & Millett J.M. 2016. Controls of mantle potential temperature and lithospheric thickness on magmatism in the North Atlantic Igneous Province: *Journal of Petrology*, 57, 417-436. DOI: 10.1093/petrology/egw014
- Lambart, S. 2017. No direct contribution of recycled crust in Icelandic basalts. *Geochem. Persp. Lett.* 4, 7-12. doi: 10.7185/geochemlet.1728
- Lambart, S., Baker, M.B., Stopler, E.M., 2016. The role of pyroxenite in basalt genesis: Melt-PX, a melting parameterization for mantle pyroxenites between 0.9 and 5 GPa. *J. Geophys. Res.* doi: 10.1002/2015JB012762.
- Le Roux, V., Dasgupta, R. & Lee, C-T. A. 2015. Recommended mineral-melt partition coefficients for FRTEs (Cu), Ga, and Ge during mantle melting. *American Mineralogist*, 100, 2533-2544.
- McKenzie, D.P., O'Nions, R.K., 1995. The source region of Ocean Island basalts. *J. Petrol.*, 36, 133-159.
- Pertermann, M., Hirschmann M.M., Hametner, D., Günther, D., Schmidt, M.W., 2004. Experimental determination of trace element partitioning between garnet and silica-rich liquid during anhydrous. *Geochem. Geophys. Geosys.*, 5. doi:10.1029/2003GC000638
- Sun, S-S. & McDonough, W. F. 1989. Chemical and isotopic systematics of oceanic basalts: implications for mantle composition and processes. In: Saunders, A.D. & Norry, M.J., (eds). *Magmatism in the ocean basins*. Geological of Society, London, Special Publications, 42, 313-345.

# Tables S1

## Peridotite. Mineral modes

|                         | Ol    | Cpx   | Opx   | Gt    | Sp   |
|-------------------------|-------|-------|-------|-------|------|
| Gt peridotite           | 0.598 | 0.076 | 0.211 | 0.115 |      |
| Modal Gt peridotite     | 0.12  | 0.7   | 0.12  | 0.06  |      |
| Modal spinel peridotite | 0.15  | 0.77  | 0.06  |       | 0.02 |
| Spinel peridotite       | 0.578 | 0.112 | 0.29  |       | 0.02 |

## Starting composition and partition coefficients.

| Starting Composition |         | Ol     | Cpx    | Opx     | Gt      | Sp     |
|----------------------|---------|--------|--------|---------|---------|--------|
| Cs                   | 0.00033 | 0.0098 | 0.031  | 0.022   | 0.042   | 0      |
| Rb                   | 0.0333  | 0.0098 | 0.031  | 0.022   | 0.042   | 0      |
| Ba                   | 0.4667  | 0.0099 | 0.026  | 0.013   | 0.023   | 0      |
| Th                   | 0.0067  | 0.01   | 0.03   | 0.01    | 0       | 0      |
| U                    | 0.0020  | 0.002  | 0.04   | 0.01    | 0       | 0      |
| Nb                   | 0.0800  | 0.01   | 0.005  | 0.00800 | 0.01211 | 0      |
| Ta                   | 0.0053  | 0.01   | 0.005  | 0.00800 | 0.01211 | 0      |
| La                   | 0.1200  | 0.007  | 0.056  | 0.002   | 0.004   | 0.001  |
| Ce                   | 0.4000  | 0.0005 | 0.092  | 0.02    | 0.007   | 0.001  |
| Pr                   | 0.0800  | 0.01   | 0.16   | 0       | 0       | 0.01   |
| Sr                   | 6.5     | 0.014  | 0.0654 | 0.06    | 0.012   | 0      |
| P                    | 35.0    | 0.0066 | 0.11   | 0.03    | 0.026   | 0.01   |
| Nd                   | 0.50    | 0.001  | 0.21   | 0.0068  | 0.087   | 0.001  |
| Zr                   | 4.50    | 0.012  | 0.1    | 0.01    | 0.32    | 0      |
| Hf                   | 0.122   | 0.012  | 0.1    | 0.03    | 0.32    | 0      |
| Sm                   | 0.180   | 0.0013 | 0.26   | 0.01    | 0.217   | 0.001  |
| Eu                   | 0.070   | 0.0016 | 0.31   | 0.013   | 0.32    | 0.01   |
| Ti                   | 0.090   | 0.006  | 0.18   | 0.016   | 0.28    | 0.15   |
| Gd                   | 0.250   | 0.0015 | 0.30   | 0.016   | 0.498   | 0.001  |
| Tb                   | 0.047   | 0.0015 | 0.31   | 0.019   | 0.75    | 0.001  |
| Dy                   | 0.320   | 0.0017 | 0.33   | 0.022   | 1.06    | 0.001  |
| Ho                   | 0.070   | 0.0016 | 0.31   | 0.026   | 1.53    | 0.001  |
| Y                    | 2.000   | 0.01   | 0.30   | 0.005   | 2       | 0      |
| Er                   | 0.200   | 0.0015 | 0.30   | 0.03    | 2       | 0.001  |
| Tm                   | 0.031   | 0.0015 | 0.29   | 0.04    | 3       | 0.001  |
| Yb                   | 0.207   | 0.0015 | 0.28   | 0.049   | 4.03    | 0.01   |
| Lu                   | 0.031   | 0.0015 | 0.28   | 0.06    | 5.5     | 0.01   |
| Ni                   | 1953    | 6.2    | 3.2    | 3.7     |         | 10     |
| Zn                   | 55      | 1      | 0.48   | 0.68    | 0.213   | 5.2    |
| Mn                   | 1200    | 1      | 1.11   | 0.75    | 1.24    | 0.46   |
| Pb                   | 0.0127  | 0.002  | 0.0400 | 0.0100  | 0.0000  | 0.0000 |
| Sc                   | 20      | 0.2    | 0.8    | 0.5     | 6.0     | 0.1    |
| Co                   | 87      | 2.1    | 1.06   | 1.04    | 0.83    | 3      |

Table S.2

## Pyroxenite. Mineral modes

|                          | Ol   | Plag | Cpx  | Opx  | Gt   |
|--------------------------|------|------|------|------|------|
| Gt pyroxenite            | 0.00 | 0.00 | 0.75 | 0.00 | 0.25 |
| Modal gt pyroxenite      | 0.00 | 0.00 | 0.75 | 0.00 | 0.25 |
| Gt-free pyroxenite       | 0.00 | 0.10 | 0.70 | 0.20 | 0.00 |
| Modal Gt-free pyroxenite | 0.00 | 0.10 | 0.70 | 0.20 | 0.00 |

## Starting composition and partition coefficients.

| Starting<br>Composition |       | Ol     | Plag   | Cpx    | Opx   | Gt      |
|-------------------------|-------|--------|--------|--------|-------|---------|
| Cs                      | 0.002 | 0.0098 | 0.071  | 0.002  | 0.022 | 0.00825 |
| Rb                      | 0.200 | 0.0098 | 0.07   | 0.002  | 0.022 | 0.00825 |
| Ba                      | 2.50  | 0.0099 | 0.260  | 0.0025 | 0.013 | 0.005   |
| Th                      | 0.06  | 0.0100 | 0.005  | 0.005  | 0.010 | 0.00411 |
| U                       | 0.03  | 0.0020 | 0.005  | 0.0065 | 0.010 | 0.018   |
| Nb                      | 1.40  | 0.0100 | 0.005  | 0.0080 | 0.008 | 0.01211 |
| Ta                      | 0.09  | 0.0100 | 0.005  | 0.0080 | 0.008 | 0.01211 |
| La                      | 1.50  | 0.0067 | 0.14   | 0.0285 | 0.020 | 0.0043  |
| Ce                      | 4.50  | 0.0060 | 0.111  | 0.0580 | 0.040 | 0.0106  |
| Pr                      | 0.75  | 0.0005 | 0.20   | 0.10   | 0.050 | 0.03    |
| Sr                      | 60    | 0.0140 | 1.000  | 0.1500 | 0.002 | 0.01325 |
| P                       | 275   | 0.0066 | 0.09   | 0.1345 | 0.030 | 0.17333 |
| Nd                      | 4.00  | 0.0066 | 0.09   | 0.150  | 0.030 | 0.14    |
| Zr                      | 35    | 0.0120 | 0.048  | 0.1630 | 0.010 | 0.55    |
| Hf                      | 1.00  | 0.0120 | 0.048  | 0.245  | 0.010 | 0.4474  |
| Sm                      | 1.40  | 0.0066 | 0.072  | 0.2515 | 0.010 | 0.36    |
| Eu                      | 0.56  | 0.0068 | 0.700  | 0.30   | 0.013 | 0.50    |
| Ti                      | 0.70  | 0.0060 | 0.050  | 0.382  | 0.100 | 0.28    |
| Gd                      | 2.10  | 0.0015 | 0.066  | 0.402  | 0.016 | 0.90    |
| Tb                      | 0.39  | 0.0015 | 0.060  | 0.400  | 0.030 | 1.40    |
| Dy                      | 2.75  | 0.0096 | 0.063  | 0.542  | 0.019 | 2.00    |
| Ho                      | 0.63  | 0.0016 | 0.048  | 0.650  | 0.03  | 3.00    |
| Y                       | 19.0  | 0.0100 | 0.030  | 0.700  | 0.03  | 4.00    |
| Er                      | 1.90  | 0.0015 | 0.041  | 0.6835 | 0.03  | 5.23    |
| Tm                      | 0.30  | 0.0015 | 0.045  | 0.720  | 0.04  | 7.00    |
| Yb                      | 2.00  | 0.0140 | 0.056  | 0.769  | 0.04  | 9.00    |
| Lu                      | 0.30  | 0.0160 | 0.053  | 0.8275 | 0.06  | 10.6    |
| Ni                      | 2868  | 7.00   |        | 22.00  |       | 8.00    |
| Zn                      | 65    | 0.980  |        | 0.680  | 0.45  | 0.89    |
| Mn                      | 1750  | 0.900  |        | 1.60   | 0.64  | 4.600   |
| Pb                      | 0     | 0.002  | 0.0100 | 0.04   | 0.010 | 0.00    |
| Sc                      | 42    | 0.2    |        | 1.9    | 0.5   | 8.0     |
| Co                      | 70    | 0      |        | 0.5    | 0.8   | 0.8     |



## Supplementary Information – Analytical techniques

### 1. Analysis of major and minor elements in olivine by Electron Probe Micro Analyser

The analysis of major and minor elements (Fe, Cr, Si, Ca, Ti, Mn, Al, Mg and Ni) in Seal Nunataks olivines was undertaken using a Cameca SX100 microprobe, fitted with five wavelength dispersive spectrometers, in the Dept of Earth Sciences, University of Cambridge over two days in November 2021. A total of 55 olivine crystals were identified across 10 sections (100 microns thick) made from the Seal Nunataks samples. The selected olivines were typically >1.5 mm and cut down their C-axis to allow for analysis of crystal cores. For easy identification of the chosen crystals during the EPMA, a laser spot was fired into the centre of each olivine crystal (30  $\mu\text{m}$  diameter, 4  $\text{J}/\text{cm}^2$  laser fluence, 10 Hz repetition rate, IVA shutter). The EPMA was made around this spot, which also subsequently allowed Laser-Ablation Inductively-Coupled Mass-Spectrometer (see below) analyses on the same spot. Between three and five separate analyses were made on each olivine crystal, except for one especially large Seal Nunataks olivine crystal where ten analyses were carried out. Column conditions were 20 KeV and 40 nA. The secondary standards showed accuracy values (mean values compared to published values) of 100.01% for  $\text{SiO}_2$ , 99.70% for MgO and 94.52% for FeO. Analytical precision (relative standard deviation, relative to the mean) was 0.27% for  $\text{SiO}_2$ , 0.43% for MgO and 0.67% for FeO.

The olivines exhibit slight normal zonation in Fo content. The highest Fo of each sample plots within or below the  $K_D = 0.27 - 0.33$  and so are in equilibrium with the melt (Figure 1).

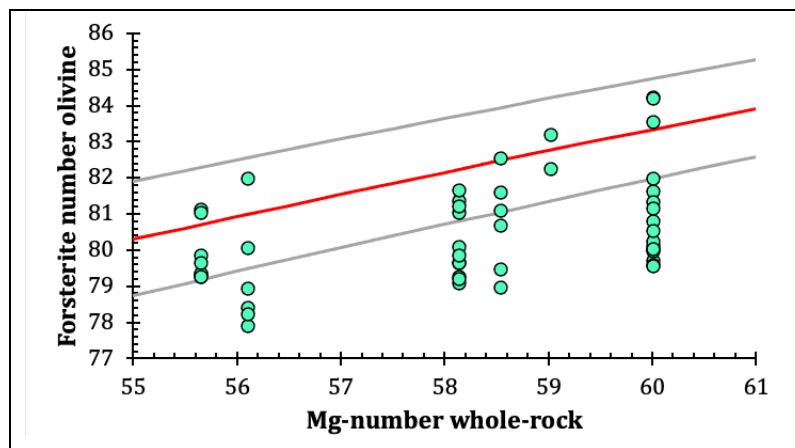

**Figure 1:** Plot showing the Mg-number of the whole-rock samples plotted against the forsterite number of the constituent olivine crystals from the corresponding Seal Nunataks sample. Whole-rock data are from Hole (1990).

## 2. Analysis of minor elements in olivine by Laser-Ablation Inductively-Coupled Mass-Spectrometer

The analysis of minor elements in olivine (Li, B, Na, Al, P, Ca, Sc, Ti, V, Cr, Mn, Co, Ni, Cu, Zn, Ga, Y, Zr, Nb, Sn and Pb) was carried out using an ESI NWR193 Laser coupled to a Perkin Elmer Nexion 350D quadrupole-based ICP-MS in the Dept of Earth Sciences, University of Cambridge over two days in November 2021. The instrument was set up with a mass flow control of 600 ml/min and a laser power of 4 J/cm<sup>2</sup> for the duration of the experiment. Laser ablation was carried out on the same spots as EPMA. Three separate analyses were made on each crystal, aside from one especially large Seal Nunatak olivine crystal where six analyses were taken. The diameter of the laser analysis spots varied from 100 µm to 50 µm due to the differing sizes of the olivine crystals and the varying amounts of clean crystal face for contaminant-free analysis. A laser diameter of 100 µm was the default based on findings from Bussweiler *et al.* (2019), who showed that fractionation effects in high-Mg olivines are especially problematic in laser analyses < 75 µm. Figure 6 shows 100 µm laser spots in an olivine crystal. The standards used during the analysis were NIST614, NIST612, NIST610, BHVO-2G, BIR-1G together with in-house standards BD4074 (olivine 3) and 06SGOL3.

The raw data was first calibrated using the NIST612 GeoReM preferred value for SiO<sub>2</sub>. The SiO<sub>2</sub> data from the EPMA was also used to calibrate for each individual olivine crystal. The raw data was then processed using peak selection to exclude anomalous signals and background data from the final values. Accuracy was assessed based on the difference between the mean of the analyses of a reference material and the recommended values.

| Accuracy (%) | NIST614 | NIST612 | NIST610 | BHVO-2G | BIR-1G |
|--------------|---------|---------|---------|---------|--------|
| Na23         | 103.78  | 100.33  | 102.69  | 76.06   | 81.25  |
| Al27         | 102.06  | 100.42  | 100.43  | 105.17  | 102.91 |
| Ca44         | 100.06  | 100.32  | 102.35  | 96.08   | 94.33  |
| Sc45         |         | 100.39  | 104.60  | 96.04   | 95.77  |
| Ti47         | 102.95  | 100.25  | 112.32  | 106.46  | 111.08 |
| V51          | 97.39   | 100.19  | 101.56  | 106.78  | 102.58 |
| Cr53         | 106.72  | 100.33  | 103.25  | 99.52   | 101.69 |
| Mn55         |         | 100.35  | 98.29   | 93.13   | 85.78  |
| Co59         | 94.94   | 100.20  | 103.71  | 105.45  | 106.80 |
| Ni60         | 95.91   | 100.24  | 100.74  | 105.29  | 101.71 |
| Cu65         | 129.44  | 100.19  | 102.68  | 99.39   | 106.62 |
| Zn66         | 89.61   | 101.57  | 108.14  | 133.25  | 119.36 |
| Ga69         | 91.76   | 100.47  | 101.55  | 103.18  | 103.86 |

There is good accuracy for the elements used in the analysis. Zn values range from 89.6% to 133.3%, and Mn values range from 85.8% to 102.1%. However, this includes standards with Zn and Mn concentrations that are an order of magnitude smaller than the olivine concentrations. These standards have lower accuracy than would be true for the studied olivine crystals, partially due to the increased effect of natural variation in the sample composition with lower concentrations. Analytical precision was assessed using the relative standard deviation to the mean value (RSD) for standards analysed during the same run as the Seal Nunataks samples (Table 2):

$$RSD = \frac{\sigma}{\mu}$$

Where  $\sigma$  is the sample standard deviation and  $\mu$  the sample mean

**Table 2:** Mean RSD values for standards run during the Seal Nunataks LA-ICP-MS session in November 2021.

| Mean<br>RSD<br>Values | <b>NIST614</b> | <b>NIST612</b> | <b>NIST610</b> | <b>BHVO-2G</b> | <b>BIR-1G</b> |
|-----------------------|----------------|----------------|----------------|----------------|---------------|
| <b>Na23</b>           | 0.34           | 3.17           | 2.63           | 5.49           | 6.63          |
| <b>Al27</b>           | 7.04           | 6.56           | 3.99           | 3.98           | 5.14          |
| <b>Ca44</b>           | 1.48           | 2.82           | 2.25           | 2.55           | 3.90          |
| <b>Sc45</b>           | 2.10           | 3.77           | 3.00           | 3.94           | 3.99          |
| <b>Ti47</b>           | 12.43          | 5.21           | 2.65           | 3.01           | 4.06          |
| <b>V51</b>            | 3.20           | 2.64           | 2.01           | 2.92           | 4.39          |
| <b>Cr53</b>           | N/A            | 4.63           | 2.15           | 3.08           | 3.59          |
| <b>Mn55</b>           | N/A            | 8.04           | 2.29           | 2.75           | 4.10          |
| <b>Co59</b>           | 1.33           | 3.56           | 2.12           | 3.76           | 4.62          |
| <b>Ni60</b>           | 12.73          | 3.91           | 2.17           | 2.72           | 3.09          |
| <b>Cu65</b>           | 4.16           | 2.92           | 2.04           | 5.25           | 4.29          |
| <b>Zn66</b>           | 7.41           | 8.08           | 2.48           | 5.72           | 5.37          |
| <b>Ga69</b>           | 6.98           | 4.01           | 2.21           | 4.78           | 3.94          |

### 3. Whole-rock analysis by ICP-MS

Samples of Seal Nunatak basalts were analysed for trace and rare earth elements on a Perkin Elmer Nexion 350D quadrupole-based ICP-MS in the Dept of Earth Sciences, University of Cambridge. Each powder was

weighed into a PFA vial to ~ 0.1 g and then digested using hydrofluoric acid and nitric acid. The digested powders were then diluted using deionised water to 50 ml. The samples then underwent a 1/10 dilution into vials (0.300 ml of sample with 2.700 ml of diluting acid) before being analysed. A calibration blank, two procedural blanks, BCR-2, BHVO-2 and AGV-2 were also analysed.

**Table 3:** Accuracy (mean analytical value\*100/published value) of standards run during the ICP-MS session in December 2021.

|    | BHVO-2 | BHVO-2<br>MM | BHVO-2<br>MM | BHVO-2 | BHVO-2 | BHVO-2 | Mean   | Reference<br>value | %<br>Accuracy |
|----|--------|--------------|--------------|--------|--------|--------|--------|--------------------|---------------|
| Li | 4.39   | 4.58         | 5.13         | 4.80   | 4.41   | 4.39   | 4.62   | 4.50               | 103           |
| P  | 1150   | 1184         | 1201         | 1166   | 1078   | 1054   | 1139   | 1172               | 97            |
| K  | 4026   | 4369         | 4179         | 4130   | 3912   | 3802   | 4070   | 4258               | 96            |
| Sc | 36.30  | 38.04        | 38.47        | 36.83  | 33.71  | 33.17  | 36.09  | 31.83              | 113           |
| Ti | 15707  | 16569        | 17266        | 16002  | 14999  | 14788  | 15888  | 16370              | 97            |
| V  | 314.20 | 317.95       | 337.99       | 306.52 | 296.46 | 293.13 | 311.04 | 318.20             | 98            |
| Cr | 262    | 282          | 289          | 261    | 263    | 246    | 267    | 287                | 93            |
| Mn | 1246   | 1323         | 1380         | 1286   | 1295   | 1261   | 1298   | 1309               | 99            |
| Co | 41.56  | 43.97        | 45.22        | 42.93  | 41.22  | 40.15  | 42.51  | 44.89              | 95            |
| Ni | 106    | 111          | 115          | 110    | 101    | 107    | 108    | 120                | 91            |
| Cu | 134    | 141          | 140          | 135    | 129    | 122    | 134    | 129                | 103           |
| Zn | 100.2  | 108.7        | 115.6        | 105.9  | 97.2   | 99.7   | 104.6  | 103.9              | 100.6         |
| Ga | 20.45  | 21.73        | 21.56        | 20.25  | 19.93  | 19.04  | 20.50  | 21.37              | 96            |
| Rb | 10.10  | 10.82        | 10.73        | 10.22  | 9.99   | 9.72   | 10.26  | 9.26               | 111           |
| Sr | 373    | 400          | 392          | 362    | 381    | 353    | 377    | 394                | 96            |
| Y  | 25.13  | 28.88        | 27.98        | 25.26  | 26.01  | 25.18  | 26.41  | 25.91              | 102           |
| Zr | 155    | 181          | 176          | 159    | 158    | 158    | 164    | 171                | 96            |
| Nb | 17.04  | 18.48        | 18.45        | 17.46  | 16.72  | 16.50  | 17.44  | 18.10              | 96            |
| Sn | 1.74   | 2.06         | 2.11         | 1.66   | 1.68   | 1.71   | 1.83   | 1.78               | 103           |
| Cs | 0.09   | 0.10         | 0.10         | 0.09   | 0.09   | 0.08   | 0.09   | 0.10               | 92            |
| Ba | 134    | 143          | 142          | 133    | 131    | 133    | 136    | 131                | 104           |
| La | 15.33  | 16.36        | 16.39        | 14.98  | 15.20  | 15.11  | 15.56  | 15.20              | 102           |
| Ce | 37.22  | 39.63        | 40.18        | 36.55  | 36.60  | 37.15  | 37.89  | 37.53              | 101           |
| Pr | 5.31   | 5.56         | 5.64         | 5.13   | 5.19   | 5.17   | 5.34   | 5.34               | 100           |
| Nd | 24.75  | 26.40        | 26.36        | 23.85  | 24.32  | 24.12  | 24.97  | 24.27              | 103           |
| Sm | 6.04   | 6.46         | 6.55         | 5.98   | 6.05   | 6.08   | 6.19   | 6.02               | 103           |
| Eu | 2.07   | 2.20         | 2.27         | 2.06   | 2.08   | 2.05   | 2.12   | 2.04               | 104           |
| Gd | 6.25   | 6.96         | 7.00         | 6.20   | 6.34   | 6.35   | 6.52   | 6.21               | 105           |

|    |      |      |      |      |      |      |      |      |     |
|----|------|------|------|------|------|------|------|------|-----|
| Tb | 0.96 | 1.03 | 1.03 | 0.95 | 0.95 | 0.95 | 0.98 | 0.94 | 104 |
| Dy | 5.29 | 5.70 | 5.62 | 5.15 | 5.19 | 5.23 | 5.37 | 5.28 | 102 |
| Ho | 0.98 | 1.05 | 1.06 | 0.97 | 0.97 | 0.97 | 1.00 | 0.99 | 101 |
| Er | 2.52 | 2.66 | 2.75 | 2.47 | 2.48 | 2.49 | 2.56 | 2.51 | 102 |
| Tm | 0.33 | 0.36 | 0.36 | 0.34 | 0.33 | 0.33 | 0.34 | 0.33 | 102 |
| Yb | 1.92 | 2.08 | 2.09 | 1.89 | 1.93 | 1.91 | 1.97 | 1.99 | 99  |
| Lu | 0.27 | 0.29 | 0.29 | 0.26 | 0.26 | 0.26 | 0.27 | 0.28 | 99  |
| Hf | 4.45 | 4.69 | 4.75 | 4.26 | 4.41 | 4.32 | 4.48 | 4.47 | 100 |
| Ta | 1.16 | 1.25 | 1.25 | 1.14 | 1.15 | 1.13 | 1.18 | 1.15 | 102 |
| Tl | 0.02 | 0.02 | 0.02 | 0.02 | 0.02 | 0.02 | 0.02 | 0.02 | 90  |
| Pb | 1.56 | 2.32 | 2.33 | 1.50 | 1.51 | 1.51 | 1.79 | 1.65 | 108 |
| Th | 1.22 | 1.27 | 1.29 | 1.17 | 1.19 | 1.17 | 1.22 | 1.22 | 99  |
| U  | 0.43 | 0.45 | 0.45 | 0.42 | 0.42 | 0.42 | 0.43 | 0.41 | 104 |

Table 3 (continued)

|    | BCR-2  | BCR-2<br>MM | BCR-2  | BCR-2<br>MM | BCR-2  | BCR-2  | Mean   | Reference<br>value | %<br>Accuracy |
|----|--------|-------------|--------|-------------|--------|--------|--------|--------------------|---------------|
| Li | 9.51   | 11.04       | 9.07   | 10.36       | 8.62   | 8.53   | 9.52   | 9.13               | 104           |
| P  | 1515   | 1624        | 1462   | 1591        | 1467   | 1315   | 1496   | 1568               | 95            |
| K  | 13731  | 15269       | 13731  | 14707       | 13473  | 12645  | 13926  | 14726              | 95            |
| Sc | 39.90  | 43.60       | 37.81  | 41.69       | 37.88  | 35.65  | 39.42  | 33.53              | 118           |
| Ti | 13328  | 14592       | 12879  | 14063       | 12847  | 12045  | 13292  | 13576              | 98            |
| V  | 421.08 | 459.91      | 407.66 | 434.81      | 408.09 | 383.19 | 419.12 | 417.60             | 100           |
| Cr | 13     | 18          | 13     | 18          | 14     | 13     | 15     | 16                 | 94            |
| Mn | 1478   | 1572        | 1453   | 1669        | 1522   | 1461   | 1526   | 1523               | 100           |
| Co | 34.82  | 37.35       | 33.76  | 39.58       | 35.66  | 33.80  | 35.83  | 37.33              | 96            |
| Ni | 11.20  | 17.75       | 11.19  | 17.61       | 11.42  | 10.52  | 13.28  | 12.57              | 106           |
| Cu | 25.14  | 29.46       | 26.31  | 30.24       | 25.59  | 25.81  | 27.09  | 19.66              | 138           |
| Zn | 118.3  | 130.2       | 116.0  | 130.7       | 118.1  | 112.4  | 120.9  | 129.5              | 93.4          |
| Ga | 20.65  | 22.44       | 20.32  | 22.69       | 20.49  | 20.25  | 21.14  | 22.07              | 96            |
| Rb | 51.89  | 57.39       | 51.49  | 56.12       | 51.02  | 49.75  | 52.95  | 46.02              | 115           |
| Sr | 309    | 351         | 323    | 336         | 311    | 305    | 323    | 337                | 96            |
| Y  | 35.20  | 39.91       | 35.02  | 37.77       | 35.14  | 33.83  | 36.15  | 36.07              | 100           |
| Zr | 180    | 200         | 172    | 189         | 178    | 166    | 181    | 187                | 97            |
| Nb | 11.87  | 13.32       | 11.61  | 13.00       | 11.48  | 11.16  | 12.07  | 12.44              | 97            |
| Sn | 2.12   | 2.61        | 2.09   | 2.63        | 2.14   | 2.11   | 2.28   | 2.28               | 100           |
| Cs | 1.06   | 1.17        | 1.04   | 1.15        | 1.03   | 1.04   | 1.08   | 1.16               | 93            |

|    |       |       |       |       |       |       |       |       |     |
|----|-------|-------|-------|-------|-------|-------|-------|-------|-----|
| Ba | 691   | 743   | 692   | 778   | 693   | 703   | 717   | 684   | 105 |
| La | 25.34 | 27.31 | 25.53 | 28.07 | 25.44 | 25.29 | 26.16 | 25.08 | 104 |
| Ce | 52.55 | 57.08 | 53.43 | 58.42 | 52.75 | 52.92 | 54.53 | 53.12 | 103 |
| Pr | 6.70  | 7.26  | 6.76  | 7.48  | 6.69  | 6.77  | 6.94  | 6.83  | 102 |
| Nd | 28.90 | 31.44 | 29.02 | 32.26 | 29.10 | 29.37 | 30.01 | 28.26 | 106 |
| Sm | 6.70  | 7.19  | 6.69  | 7.49  | 6.68  | 6.81  | 6.93  | 6.55  | 106 |
| Eu | 1.93  | 2.10  | 1.98  | 2.18  | 1.93  | 1.97  | 2.02  | 1.99  | 101 |
| Gd | 6.81  | 7.45  | 6.96  | 7.25  | 6.73  | 6.86  | 7.01  | 6.81  | 103 |
| Tb | 1.08  | 1.18  | 1.08  | 1.19  | 1.07  | 1.07  | 1.11  | 1.08  | 103 |
| Dy | 6.36  | 6.92  | 6.42  | 6.98  | 6.32  | 6.28  | 6.55  | 6.42  | 102 |
| Ho | 1.29  | 1.39  | 1.33  | 1.44  | 1.30  | 1.32  | 1.35  | 1.31  | 103 |
| Er | 3.64  | 3.90  | 3.70  | 4.08  | 3.68  | 3.65  | 3.77  | 3.67  | 103 |
| Tm | 0.53  | 0.57  | 0.53  | 0.59  | 0.52  | 0.53  | 0.55  | 0.53  | 102 |
| Yb | 3.29  | 3.55  | 3.29  | 3.65  | 3.28  | 3.31  | 3.40  | 3.39  | 100 |
| Lu | 0.49  | 0.54  | 0.50  | 0.54  | 0.49  | 0.49  | 0.51  | 0.50  | 101 |
| Hf | 4.91  | 5.30  | 5.00  | 5.48  | 4.90  | 4.98  | 5.09  | 4.97  | 102 |
| Ta | 0.76  | 0.83  | 0.79  | 0.88  | 0.78  | 0.78  | 0.80  | 0.79  | 102 |
| Tl | 0.25  | 0.28  | 0.26  | 0.29  | 0.26  | 0.25  | 0.26  | 0.27  | 99  |
| Pb | 10.21 | 13.00 | 10.32 | 13.44 | 10.19 | 10.24 | 11.23 | 10.59 | 106 |
| Th | 5.86  | 6.36  | 5.87  | 6.46  | 5.82  | 5.90  | 6.04  | 5.83  | 104 |
| U  | 1.71  | 1.84  | 1.71  | 1.89  | 1.69  | 1.74  | 1.76  | 1.68  | 105 |

Table 3 (continued)

|    | AGV-2  | AGV-2  | Mean   | Reference<br>value | %<br>Accuracy |
|----|--------|--------|--------|--------------------|---------------|
| Li | 10.25  | 9.95   | 10.10  | 10.80              | 94            |
| P  | 1898   | 1842   | 1870   | 2108               | 89            |
| K  | 21372  | 20015  | 20693  | 24056              | 86            |
| Sc | 15.68  | 14.99  | 15.33  | 13.11              | 117           |
| Ti | 5617   | 5298   | 5457   | 6300               | 87            |
| V  | 107.88 | 107.15 | 107.51 | 118.50             | 91            |
| Cr | 14     | 13     | 13     | 16                 | 83            |
| Mn | 716    | 701    | 708    | 778                | 91            |
| Co | 14.73  | 13.73  | 14.23  | 15.46              | 92            |
| Ni | 16.79  | 16.15  | 16.47  | 18.87              | 87            |
| Cu | 48.21  | 47.43  | 47.82  | 51.51              | 93            |
| Zn | 71.7   | 74.0   | 72.8   | 86.7               | 84            |
| Ga | 19.09  | 18.81  | 18.95  | 20.42              | 93            |
| Rb | 72.63  | 73.88  | 73.26  | 67.79              | 108           |
| Sr | 629    | 675    | 652    | 660                | 99            |
| Y  | 19.29  | 19.99  | 19.64  | 19.14              | 103           |
| Zr | 214    | 226    | 220    | 232                | 95            |
| Nb | 12.89  | 12.68  | 12.79  | 14.12              | 91            |
| Sn | 1.83   | 1.84   | 1.83   | 1.83               | 100           |
| Cs | 1.06   | 1.08   | 1.07   | 1.17               | 91            |
| Ba | 1139   | 1150   | 1144   | 1134               | 101           |
| La | 38.20  | 37.87  | 38.03  | 38.21              | 100           |
| Ce | 68.44  | 68.43  | 68.44  | 69.43              | 99            |
| Pr | 7.97   | 7.97   | 7.97   | 8.17               | 98            |
| Nd | 30.57  | 30.32  | 30.45  | 30.49              | 100           |
| Sm | 5.51   | 5.53   | 5.52   | 5.51               | 100           |
| Eu | 1.45   | 1.43   | 1.44   | 1.55               | 93            |
| Gd | 4.24   | 4.18   | 4.21   | 4.68               | 90            |
| Tb | 0.64   | 0.63   | 0.64   | 0.65               | 98            |
| Dy | 3.42   | 3.44   | 3.43   | 3.55               | 97            |
| Ho | 0.67   | 0.67   | 0.67   | 0.68               | 98            |
| Er | 1.80   | 1.81   | 1.80   | 1.83               | 99            |
| Tm | 0.26   | 0.26   | 0.26   | 0.26               | 99            |
| Yb | 1.60   | 1.61   | 1.60   | 1.65               | 97            |
| Lu | 0.24   | 0.24   | 0.24   | 0.25               | 96            |

|    |       |       |       |       |     |
|----|-------|-------|-------|-------|-----|
| Hf | 5.20  | 5.23  | 5.21  | 5.14  | 101 |
| Ta | 0.85  | 0.83  | 0.84  | 0.87  | 97  |
| Tl | 0.26  | 0.26  | 0.26  | 0.28  | 96  |
| Pb | 13.48 | 13.41 | 13.44 | 13.14 | 102 |
| Th | 6.08  | 6.02  | 6.05  | 6.17  | 98  |
| U  | 1.91  | 1.91  | 1.91  | 1.89  | 101 |

**Table 4:** RSD values for reference materials run during the ICP-MS session in December 2021.

| <b>RSD Values</b> | <b>BCR-2</b> | <b>BHVO-2</b> | <b>AGV-2</b> |
|-------------------|--------------|---------------|--------------|
| <b>Li</b>         | 9.01         | 6.51          | 0.20         |
| <b>P</b>          | 4.95         | 3.22          | 0.18         |
| <b>K</b>          | 5.21         | 3.50          | 2.71         |
| <b>Sc</b>         | 5.63         | 4.71          | 1.28         |
| <b>Ti</b>         | 5.34         | 5.16          | 2.24         |
| <b>V</b>          | 4.49         | 4.71          | 1.42         |
| <b>Cr</b>         | 14.49        | 5.51          | 1.17         |
| <b>Mn</b>         | 6.00         | 4.63          | 0.43         |
| <b>Co</b>         | 6.52         | 4.10          | 3.08         |
| <b>Ni</b>         | 24.81        | 4.11          | 0.82         |
| <b>Cu</b>         | 8.21         | 4.11          | 0.74         |
| <b>Zn</b>         | 5.59         | 6.16          | 3.93         |
| <b>Ga</b>         | 5.22         | 4.14          | 0.86         |
| <b>Rb</b>         | 5.01         | 3.70          | 3.09         |
| <b>Sr</b>         | 5.01         | 4.72          | 6.87         |
| <b>Y</b>          | 5.14         | 6.26          | 4.40         |
| <b>Zr</b>         | 5.15         | 6.71          | 5.63         |
| <b>Nb</b>         | 6.28         | 4.34          | 0.70         |



|           |       |       |      |
|-----------|-------|-------|------|
| <b>Rh</b> | 3.17  | 2.54  | 1.89 |
| <b>In</b> | 1.28  | 1.76  | 2.22 |
| <b>Sn</b> | 10.85 | 9.71  | 1.84 |
| <b>Cs</b> | 4.95  | 5.85  | 0.91 |
| <b>Ba</b> | 5.29  | 4.32  | 0.64 |
| <b>La</b> | 5.05  | 4.48  | 1.89 |
| <b>Ce</b> | 5.10  | 4.57  | 1.28 |
| <b>Pr</b> | 5.26  | 4.37  | 1.31 |
| <b>Nd</b> | 5.19  | 4.86  | 1.85 |
| <b>Sm</b> | 5.14  | 4.29  | 1.02 |
| <b>Eu</b> | 5.44  | 4.69  | 2.21 |
| <b>Gd</b> | 5.94  | 5.33  | 1.96 |
| <b>Tb</b> | 5.46  | 4.54  | 2.30 |
| <b>Dy</b> | 5.41  | 4.78  | 0.81 |
| <b>Ho</b> | 4.64  | 4.67  | 1.02 |
| <b>Er</b> | 4.95  | 4.73  | 0.85 |
| <b>Tm</b> | 5.21  | 4.63  | 2.13 |
| <b>Yb</b> | 5.19  | 4.92  | 0.86 |
| <b>Lu</b> | 5.50  | 4.87  | 0.95 |
| <b>Hf</b> | 4.97  | 4.67  | 0.88 |
| <b>Ta</b> | 5.77  | 4.93  | 2.79 |
| <b>Tl</b> | 5.80  | 5.18  | 1.84 |
| <b>Pb</b> | 14.12 | 22.83 | 1.61 |
| <b>Th</b> | 5.17  | 4.56  | 1.99 |
| <b>U</b>  | 5.04  | 3.99  | 1.39 |

## References

- Bussweiler, Y., Giuliani, A., Greig, A., Kjarsgaard, B. A., Petts, D., Jackson, S. E., Barrett, N., Luo, Y. & Pearson, D. G. (2019). Trace element analysis of high-Mg olivine by LA-ICP-MS – Characterization of natural olivine standards for matrix-matched calibration and application to mantle peridotites. *Chemical Geology* **524**, 136–157.
- Hole, M. J. (1990). Geochemical evolution of Pliocene-Recent post-subduction alkalic basalts from Seal Nunataks, Antarctic Peninsula. *Journal of Volcanology and Geothermal Research* **40**, 149–167.
