# Supplementary material
Source: publisher figshare collection journal article supplement (https://gsapubs.figshare.com/articles/dataset/_/21824805)
Supplement: Supplementary file 1 [file 1]

## Sheet: Sheet1
Seal Nunataks		Point#	SiO2	MgO	Al2O3	CaO	TiO2	FeO	Cr2O3	NiO	MnO	Total	Fo	Cr ppm	Al ppm	Ca ppm	Fe ppm	Ni ppm	Mn ppm	Mg ppm	Ti ppm	Na	Al	Ca	Sc	Ti	V	Cr	Mn	Ni	Zn		104*Zn/Fe	100Mn/Fe
			Oxide wt% determined by EMPA											EMPA data calculated as ppm								Elements ppm determined by ICP-MS
R3717_1_new_ol1_1	ol1	1	39.0629	41.9262	0.0805	0.2461	0.0147	17.1432	0.0139	0.1723	0.2124	98.8724	81.3415	95.1038	426.087	1758.88	133254	1354.02	1645.04	252815	88.1265	49.83	192.82	1476.65	4.33	75.95	6.49	264.61	1691.08	1471.3	164.9		12.3749	1.26906
R3717_1_new_ol1_2	ol1	2	39.313	42.5776	0.0766	0.2424	0.0105	17.385	0.0363	0.164	0.2213	100.027	81.3629	248.365	405.444	1732.43	135134	1288.79	1713.97	256743	62.9475	57.39	211.75	1566.44	4.71	78.79	8.05	278.84	1679.67	1472.9	167.2		12.3729	1.24297
R3717_1_new_ol1_3	ol1	3	39.315	42.7035	0.0423	0.2405	0.0115	17.4138	0.0434	0.1722	0.2115	100.154	81.3826	296.943	223.894	1718.85	135357	1353.23	1638.07	257502	68.9425	57.56	131.53	1424.76	4.24	76.15	7.87	253.03	1684.51	1406.43	161.65		11.9425	1.24449
R3717_1_new_ol1_4	ol1	4	39.3064	42.3737	0.0435	0.2599	0.0239	17.9014	0.0374	0.1631	0.2356	100.345	80.8407	255.891	230.245	1857.51	139148	1281.72	1824.72	255513	143.281
R3717_1_new_ol1_5	ol1	5	39.2508	42.6855	0.0412	0.2465	0.005	17.5274	0.0327	0.1674	0.2392	100.196	81.2775	223.733	218.072	1761.74	136240	1315.51	1852.6	257394	29.975
R3717_1_new_ol2_1	ol2	6	39.2061	42.395	0.0464	0.2333	0.0192	17.8127	0.0289	0.1842	0.2147	100.141	80.9253	197.734	245.595	1667.4	138458	1447.54	1662.85	255642	115.104	52.63	144.89	1317.51	4.42	72.04	8.54	237.23	1543.64	1344.16	159.62		11.5284	1.11488
R3717_1_new_ol2_2	ol2	7	39.3778	42.5992	0.0438	0.2443	0.0201	17.6331	0.043	0.1897	0.2259	100.377	81.1549	294.206	231.833	1746.01	137062	1490.76	1749.6	256873	120.499	50.51	151.27	1385.73	4.93	75.98	7.95	231.12	1636.03	1231.83	156.98		11.4532	1.19364
R3717_1_new_ol2_3	ol2	8	39.2815	42.2463	0.0436	0.2283	0.0145	18.0712	0.0457	0.1743	0.2233	100.329	80.6471	312.679	230.775	1631.66	140467	1369.74	1729.46	254745	86.9275	57.61	315.14	1455.14	4.94	88.75	8.65	234.69	1692.58	1304.67	169.24		12.0483	1.20496
R3717_1_new_ol2_4	ol2	9	39.472	42.4588	0.041	0.23	0.0169	18.0202	0.0403	0.168	0.2369	100.684	80.7693	275.733	217.013	1643.81	140071	1320.23	1834.79	256027	101.315
R3717_1_new_ol2_5	ol2	10	39.3259	42.2104	0.039	0.2246	0.0226	18.1306	0.0328	0.1767	0.2268	100.389	80.5826	224.418	206.427	1605.22	140929	1388.6	1756.57	254529	135.487
R3717_1_new_ol3_1	ol3	11	39.1757	41.926	0.0334	0.2481	0.0182	18.4127	0.0277	0.1572	0.2334	100.232	80.2329	189.523	176.786	1773.17	143122	1235.36	1807.68	252814	109.109	52.07	173.26	1563.25	4.37	79.1	6.52	193.67	1705.6	1113.5	160.01		11.18	1.19171
R3717_1_new_ol3_2	ol3	12	39.335	42.066	0.0323	0.2543	0.0177	18.2926	0.0281	0.1422	0.2513	100.419	80.389	192.26	170.964	1817.48	142188	1117.48	1946.32	253658	106.112	44.15	212.41	1570.5	4.58	85.36	6.62	197.82	1707.45	1114.27	152.94		10.7562	1.20084
R3717_1_new_ol3_3	ol3	13	39.4655	42.0018	0.0254	0.2617	0.0177	18.4921	0.0322	0.1471	0.2342	100.678	80.1932	220.312	134.442	1870.37	143739	1155.99	1813.88	253271	106.112	41.59	231.01	1592.39	4.63	87.61	7.82	197.06	1662.52	1105.35	146.57		10.1969	1.15662
R3717_1_new_ol3_4	ol3	14	39.4076	41.701	0.0388	0.2618	0.0206	18.3776	0.0243	0.1334	0.2496	100.215	80.1777	166.261	205.368	1871.08	142849	1048.32	1933.15	251457	123.497
R3717_1_new_ol3_5	ol3	15	39.3164	41.9166	0.0371	0.2651	0.0141	18.3746	0.0296	0.1468	0.2419	100.342	80.2621	202.523	196.37	1894.67	142826	1153.63	1873.52	252757	84.5295
R3717_1_new_ol3_rim	ol3-rim	16	40.7876	31.9033	6.4743	2.3866	0.192	16.9411	0.0335	0.088	0.2338	99.0401	77.0478	229.207	34268.5	17057	131683	691.548	1810.78	192377	1151.04
R3717_1_new_ol4_4	ol4	20	39.5049	42.8321	0.0495	0.2252	0.0137	17.5251	0.0513	0.2024	0.219	100.623	81.3316	350.995	262.004	1609.5	136223	1590.56	1696.15	258278	82.1315
R3717_1_new_ol4_2	ol4	18	39.1566	42.5267	0.0667	0.2302	0.007	17.6445	0.0472	0.1928	0.2283	100.1	81.1189	322.942	353.043	1645.24	137151	1515.12	1768.18	256436	41.965	57.16	155.12	1314.99	3.92	84	7.32	272.77	1603.81	1578.42	161.68		11.7885	1.16938
R3717_1_new_ol4_3	ol4	19	39.6296	42.8651	0.0714	0.2327	0.0081	17.2591	0.0398	0.2015	0.2256	100.533	81.5743	272.312	377.92	1663.11	134155	1583.49	1747.27	258477	48.5595	59.45	325.01	1643.22	4.43	82.68	8.13	274.85	1713.03	1532.36	171.73		12.8009	1.2769
R3717_1_new_ol4_5	ol4	21	39.1379	41.9415	0.0383	0.2385	0.0178	18.1075	0.042	0.1719	0.2382	99.9336	80.5024	287.364	202.722	1704.56	140750	1350.88	1844.86	252907	106.711
R3717_1_new_ol4_1	ol4	17	39.2505	42.3353	0.5559	0.2426	0.0148	17.6948	0.0596	0.1996	0.208	100.561	81.0059	407.783	2942.38	1733.86	137542	1568.56	1610.96	255282	88.726	58.09	342.92	1373.7	4.56	79.18	8.9	273.68	1650.38	1497.01	163.87		11.9142	1.19991
R3717_1_new_ol4_rim	ol4-rim	22	38.6112	40.2429	0.0493	0.3247	0.0417	19.8228	0.0313	0.1056	0.2728	99.5023	78.3494	214.155	260.945	2320.63	154083	829.858	2112.84	242665	249.992
R3717_1_new_ol5_1	ol5	23	39.3625	41.9793	0.0387	0.2271	0.0156	18.2564	0.0339	0.1841	0.2424	100.34	80.3877	231.944	204.839	1623.08	141907	1446.75	1877.39	253135	93.522	62.66	<0.00	1444.6	4.57	75.65	8.16	239.05	1715.94	1451.01	166.33		11.7211	1.2092
R3717_1_new_ol5_2	ol5	24	39.3602	42.1102	0.0377	0.229	0.0142	18.1766	0.0466	0.1868	0.2265	100.388	80.5056	318.837	199.546	1636.66	141287	1467.97	1754.24	253925	85.129	50.11	236.95	1396.25	4.53	71.57	7.58	269.43	1624.76	1628.64	155.57		11.0109	1.14997
R3717_1_new_ol5_3	ol5	25	39.5175	42.0321	0.0822	0.2428	0.0146	18.0674	0.0386	0.1792	0.2338	100.408	80.571	264.101	435.085	1735.29	140438	1408.24	1810.78	253454	87.527	49.33	151.87	1276.46	4.11	65.13	7.19	247.07	1594.97	1559.36	175.95		12.5287	1.13571
R3717_1_new_ol5_4	ol5	26	39.2446	42.2577	0.0366	0.2261	0.0146	18.2399	0.0293	0.1875	0.2372	100.474	80.5059	200.471	193.724	1615.94	141779	1473.47	1837.11	254814	87.527
R3717_1_new_ol5_5	ol5	27	39.445	42.2467	0.0421	0.221	0.0166	17.9414	0.0431	0.1968	0.2177	100.37	80.7596	294.89	222.835	1579.49	139459	1546.55	1686.09	254748	99.517
R3717_1_new_ol6_1	ol6	28	39.2739	41.8709	0.0304	0.2576	0.0191	18.5951	0.0273	0.1349	0.2352	100.445	80.0551	186.787	160.907	1841.07	144540	1060.11	1821.62	252482	114.504	45.33	122.84	1580.39	4.85	90.95	7.38	190.59	1798.64	1118.26	163.99		11.3457	1.24439
R3717_1_new_ol6_2	ol6	29	39.0107	41.022	0.0984	0.2744	0.0078	18.5131	0.036	0.1283	0.2398	99.3305	79.7973	246.312	520.831	1961.14	143902	1008.25	1857.25	247363	46.761	43.92	164.16	1634.87	4.85	93.26	7.92	195.93	1874.04	1122.49	156.6		10.8824	1.3023
R3717_1_new_ol6_3	ol6	30	39.0256	41.6041	0.0401	0.2646	0.0221	18.501	0.0424	0.1322	0.2298	99.8619	80.034	290.101	212.249	1891.1	143808	1038.89	1779.8	250873	132.49	45.84	152.71	1530.56	4.64	86.64	6.44	188.56	1763.27	1084.34	154.16		10.7198	1.22613
R3717_1_new_ol6_4	ol6	31	39.1222	41.7508	0.0342	0.2568	0.0171	18.6331	0.0226	0.1316	0.2472	100.216	79.9765	154.629	181.021	1835.35	144835	1034.18	1914.56	251757	102.514
R3717_1_new_ol6_5	ol6	32	38.9417	41.9132	0.0301	0.2578	0.0095	18.4052	0.0272	0.151	0.2401	99.9758	80.2345	186.102	159.319	1842.5	143064	1186.63	1859.57	252737	56.9525
R3717_1_old_ol1_1	ol1	1	39.6849	42.713	0.0465	0.2325	0.0225	16.8822	0.0483	0.1931	0.2167	100.04	81.8511	330.469	246.125	1661.68	131225	1517.48	1678.34	257559	134.887	<223.50	312.93	1405.63	4.53	79.84	7.71	303.64	1593.92	1541.25	180.26		13.7367	1.21464
R3717_1_old_ol1_4	ol1	4	39.4692	42.3513	0.0414	0.2375	0.0148	17.5438	0.0362	0.1796	0.2254	100.099	81.1432	247.68	219.13	1697.41	136368	1411.39	1745.72	255378	88.726
R3717_1_old_ol1_2	ol1	2	39.05	42.8151	0.0652	0.2409	0.0149	16.9364	0.0376	0.1987	0.1986	99.5573	81.8389	257.259	345.104	1721.71	131647	1561.48	1538.16	258175	89.3255	<223.88	172.73	2177.34	4.53	75.01	9.11	296.82	1608.22	1500.96	171.87		13.0554	1.22162
R3717_1_old_ol1_5	ol1	5	39.4876	42.8921	0.0407	0.2418	0.0156	17.1811	0.0352	0.1832	0.228	100.305	81.6517	240.838	215.425	1728.14	133549	1439.68	1765.86	258639	93.522
R3717_1_old_ol1_3	ol1	3	39.5364	42.374	0.0513	0.2419	0.0161	17.2802	0.0477	0.1948	0.2118	99.9541	81.3819	326.363	271.531	1728.86	134319	1530.84	1640.39	255515	96.5195	<234.71	104.42	1498.6	5.04	85.1	8.74	294.77	1765.4	1540.82	186.61		13.893	1.31433
R3717_1_old_ol1_rim	ol1-rim	6	39.2658	41.3862	0.0308	0.278	0.0305	18.6679	0.0258	0.1215	0.2485	100.055	79.8056	176.524	163.024	1986.87	145106	954.808	1924.63	249559	182.847
R3717_1_old_ol11_1	ol11	54	39.5454	43.489	0.0467	0.209	0.0111	16.702	0.0323	0.2194	0.2002	100.455	82.274	220.997	247.183	1493.72	129825	1724.15	1550.55	262239	66.5445	<263.69	132.23	1308.74	4.24	75.11	7.5	219.69	1609.83	1215.41	170.36		13.1223	1.24
R3717_1_old_ol11_2	ol11	55	39.6404	43.2675	0.0764	0.2133	0.0183	16.6592	0.0367	0.2151	0.2113	100.338	82.237	251.101	404.385	1524.46	129492	1690.36	1636.52	260903	109.709	<269.44	329.36	1265.57	4.1	69.45	8.29	255.92	1610.96	1443.28	158.8		12.2633	1.24406
R3717_1_old_ol11_3	ol11	56	39.501	43.3459	0.0474	0.2102	0.008	17.0282	0.0287	0.2161	0.2128	100.598	81.9415	196.365	250.888	1502.3	132360	1698.22	1648.14	261376	47.96	<286.59	287.08	1474.14	4.76	83.19	8.06	208.59	1768.76	1128.19	166.26		12.5612	1.33632
R3717_1_old_ol11_4	ol11	57	39.3903	43.1437	0.0556	0.2175	0.0166	17.1945	0.031	0.2187	0.206	100.474	81.7275	212.102	294.291	1554.47	133653	1718.65	1595.47	260157	99.517
R3717_1_old_ol11_5	ol11	58	39.6002	42.8362	0.0469	0.2228	0.0186	17.1932	0.0435	0.2124	0.226	100.4	81.6216	297.627	248.242	1592.35	133643	1669.15	1750.37	258302	111.507
R3717_1_old_ol3_1	ol3	13	39.0342	41.3652	0.0456	0.2357	0.0147	18.8693	0.0294	0.1525	0.2531	99.9998	79.6239	201.155	241.361	1684.55	146671	1198.42	1960.26	249432	88.1265	<99.81	151.44	661.81	2.23	28.97	3.32	93.79		510.41	78.23		5.3337
R3717_1_old_ol3_2	ol3	14	38.9459	41.441	0.0438	0.2367	0.0081	18.704	0.0326	0.1557	0.2496	99.8173	79.7958	223.049	231.833	1691.69	145386	1223.57	1933.15	249889	48.5595	<224.09	143.72	1438.23	5.3	71.36	8.1	212.38	1833.7	1182.92	169.16		11.6352	1.26126
R3717_1_old_ol3_3	ol3	15	39.2764	41.427	0.0652	0.2428	0.0128	18.826	0.0378	0.1665	0.2538	100.308	79.6853	258.628	345.104	1735.29	146334	1308.44	1965.68	249805	76.736	<222.02	322.07	1528.46	5.08	88.58	8.06	219.55	1939.63	1213.23	184.67		12.6197	1.32548
R3717_1_old_ol3_4	ol3	16	39.3181	41.2886	0.0485	0.2382	0.0142	18.7972	0.0389	0.1488	0.2534	100.146	79.6559	266.154	256.711	1702.42	146111	1169.34	1962.58	248970	85.129
R3717_1_old_ol3_5	ol3	17	39.3219	41.5719	0.0353	0.2353	0.0291	18.7937	0.0247	0.1523	0.2461	100.41	79.7695	168.997	186.843	1681.69	146083	1196.85	1906.04	250679	174.454
R3717_1_old_ol4_1	ol4	19	39.3266	41.3726	0.0339	0.2615	0.0199	19.0156	0.0366	0.1492	0.2442	100.46	79.5012	250.417	179.433	1868.94	147808	1172.49	1891.33	249477	119.3	<263.17	258.46	1637.61	5.39	88.56	10.23	214.26	1920.24	1182.05	203.73		13.7834	1.29914
R3717_1_old_ol4_2	ol4	20	39.3916	41.2609	0.2846	0.2638	0.0154	18.8583	0.0321	0.1345	0.2476	100.489	79.5924	219.628	1506.39	1885.38	146586	1056.97	1917.66	248803	92.323	<266.36	121.52	1661.38	5.39	98.85	7.73	211.81	1962.27	1165.24	190.92		13.0245	1.33865
R3717_1_old_ol4_3	ol4	21	39.3274	41.34	0.0546	0.2671	0.0167	18.8909	0.0581	0.1413	0.2594	100.355	79.5954	397.52	288.998	1908.96	146839	1110.41	2009.05	249280	100.117	<267.47	110.73	1602.74	5.4	98.06	8.16	222.17	1936.85	1196.6	187.81		12.7902	1.31903
R3717_1_old_ol4_4	ol4	22	39.3441	41.4809	0.0387	0.2701	0.0117	18.9337	0.033	0.1301	0.2453	100.487	79.6139	225.786	204.839	1930.4	147172	1022.39	1899.85	250130	70.1415
R3717_1_old_ol4_5	ol4	23	39.1925	41.5252	0.103	0.2734	0.0197	19.0465	0.0185	0.1446	0.2452	100.569	79.5347	126.577	545.179	1953.99	148048	1136.34	1899.07	250397	118.101
R3717_1_old_ol5_1	ol5	24	39.1652	41.7575	0.0485	0.2435	0.0175	18.5289	0.0409	0.1387	0.2431	100.184	80.0687	279.838	256.711	1740.29	144025	1089.97	1882.81	251798	104.913	<216.43	171.98	1491.31	5.02	86.34	7.7	206.93	1835.91	1131.77	175.93		12.2152	1.27471
R3717_1_old_ol5_2	ol5	25	39.1524	41.5209	0.0493	0.2536	0.0123	18.5656	0.0321	0.1483	0.2342	99.9686	79.9462	219.628	260.945	1812.48	144310	1165.42	1813.88	250371	73.7385	<227.54	51.06	1503.24	4.85	91.03	7.75	221.23	1811.23	1171.08	181.92		12.6062	1.25509
R3717_1_old_ol5_3	ol5	26	39.2507	41.6869	0.0457	0.259	0.0125	18.6243	0.03	0.1472	0.2382	100.295	79.9595	205.26	241.89	1851.07	144767	1156.77	1844.86	251372	74.9375	<230.84	93.75	1435.71	4.67	90.72	9.5	225.33	1757.22	1167.23	168.04		11.6076	1.21383
R3717_1_old_ol5_4	ol5	27	39.2708	41.5931	0.0433	0.2482	0.0278	18.6047	0.0362	0.145	0.2603	100.229	79.9403	247.68	229.187	1773.89	144614	1139.48	2016.02	250806	166.661
R3717_1_old_ol5_5	ol5	28	39.1107	41.9274	0.0696	0.2638	0.0183	18.6367	0.0342	0.1436	0.2522	100.457	80.0409	233.996	368.393	1885.38	144863	1128.48	1953.29	252822	109.709
R3717_1_old_ol6_1	ol6	29	39.1646	41.8968	0.0431	0.2564	0.0159	18.6003	0.0268	0.1448	0.244	100.392	80.0605	183.366	228.128	1832.49	144580	1137.91	1889.78	252638	95.3205	<242.42	105.48	1407.66	4.7	78.97	8.14	205.36	1725.54	1117.4	164.73		11.3937	1.19348
R3717_1_old_ol6_2	ol6	30	39.2236	41.7285	0.0374	0.263	0.0133	18.5006	0.0299	0.1464	0.2331	100.176	80.082	204.576	197.958	1879.66	143805	1150.48	1805.36	251623	79.7335	<266.66	52.48	1569.6	5.15	89.11	9.36	219.4	1802.46	1128.98	174.72		12.1498	1.2534
R3717_1_old_ol6_3	ol6	31	39.2997	41.7976	0.0448	0.2546	0.0139	18.5574	0.0262	0.141	0.2481	100.383	80.0595	179.26	237.126	1819.63	144247	1108.05	1921.53	252040	83.3305	<263.42	104.91	1504.24	5.13	85.69	10.05	217.42	1791.08	1200.98	172.41		11.9524	1.24168
R3717_1_old_ol6_4	ol6	32	39.0866	41.8698	0.0509	0.2602	0.0108	18.3707	0.0388	0.1581	0.2307	100.077	80.2478	265.47	269.414	1859.65	142795	1242.43	1786.77	252475	64.746
R3717_1_old_ol6_5	ol6	33	39.0949	41.8048	0.073	0.2715	0.0152	18.3688	0.0242	0.1384	0.2494	100.04	80.2248	165.576	386.389	1940.41	142781	1087.62	1931.6	252083	91.124
R3717_1_old_ol7_1	ol7	34	39.1275	41.6233	0.0623	0.2524	0.0189	18.5349	0.0345	0.1492	0.2375	100.04	80.0121	236.049	329.754	1803.9	144072	1172.49	1839.44	250988	113.305	<484.42	175.3	1435.43	4.69	87.21	7.83	223.07	1742.13	1067.31	168.74		11.7122	1.20921
R3717_1_old_ol7_2	ol7	35	39.2889	41.786	0.04	0.2575	0.0163	18.4506	0.0332	0.146	0.2507	100.269	80.1471	227.154	211.72	1840.35	143417	1147.34	1941.67	251970	97.7185	<500.77	<0.00	1453.7	5.27	105.78	7.97	217.99	1898.48	1130.34	186.15		12.9797	1.32375
R3717_1_old_ol7_3	ol7	36	39.2069	41.3925	0.0683	0.2671	0.0346	18.4718	0.0232	0.1473	0.2422	99.8538	79.9777	158.734	361.512	1908.96	143581	1157.56	1875.84	249597	207.427	<498.38	92.1	1462.98	4.78	73.73	6.8	192.76	1804.86	1108.15	171.72		11.9598	1.25703
R3717_1_old_ol7_4	ol7	37	39.3939	41.8531	0.0392	0.2606	0.0215	18.7133	0.0309	0.1443	0.2378	100.695	79.9469	211.418	207.486	1862.51	145458	1133.98	1841.76	252374	128.892
R3717_1_old_ol7_5	ol7	38	39.1912	41.5671	0.0516	0.2586	0.0105	18.5945	0.0262	0.1307	0.242	100.073	79.9391	179.26	273.119	1848.21	144535	1027.11	1874.29	250650	62.9475
R3717_1_old_ol8_1	ol8	39	39.0749	41.4279	0.0417	0.2627	0.0158	19.0347	0.0285	0.1354	0.2495	100.271	79.5066	194.997	220.718	1877.52	147957	1064.04	1932.38	249810	94.721	<599.93	318.76	1460	4.9	77.81	7.23	195.02	1885.74	1136.21	184		12.4361	1.27452
R3717_1_old_ol8_2	ol8	40	39.1697	41.4837	0.0437	0.2592	0.013	18.7685	0.0262	0.1364	0.2452	100.145	79.7569	179.26	231.304	1852.5	145888	1071.9	1899.07	250147	77.935	<540.67	99.5	1331.66	4.03	78.58	7.08	171.22	1716.35	1061.82	168.52		11.5514	1.17649
R3717_1_old_ol8_3	ol8	41	39.2337	41.3847	0.0367	0.2642	0.0149	19.1818	0.0365	0.143	0.2405	100.536	79.3638	249.733	194.253	1888.24	149100	1123.77	1862.67	249550	89.3255	<600.73	<0.00	1363	4.54	80.05	6.94	179.86	1754.31	1059.91	178.86		11.996	1.1766
R3717_1_old_ol8_4	ol8	42	39.083	41.6443	0.0386	0.2714	0.0241	18.9761	0.0299	0.1365	0.2578	100.462	79.6414	204.576	204.31	1939.7	147501	1072.69	1996.66	251115	144.48
R3717_1_old_ol8_5	ol8	43	39.0327	41.6735	0.0382	0.2589	0.016	19.0976	0.0298	0.1334	0.2451	100.525	79.5491	203.892	202.193	1850.36	148446	1048.32	1898.3	251291	95.92
R3717_1_old_ol2_rim	ol2-rim	12	39.3735	41.5291	0.0324	0.3058	0.0377	18.7447	0.0206	0.1154	0.2607	100.42	79.795	140.945	171.493	2185.55	145703	906.871	2019.12	250420	226.011
R3717_1_old_ol2_5	ol2	11	39.6277	44.0306	0.0427	0.2477	0.0216	15.8139	0.0492	0.2001	0.1896	100.223	83.2304	336.626	226.011	1770.31	122921	1572.49	1468.45	265505	129.492
R3717_1_old_ol2_4	ol2	10	39.7291	44.2332	0.0392	0.2332	0.0131	15.6336	0.0431	0.2024	0.1948	100.322	83.4533	294.89	207.486	1666.68	121520	1590.56	1508.73	266726	78.5345
R3717_1_old_ol2_3	ol2	9	40.106	44.2982	0.0544	0.2474	0.0132	15.5152	0.034	0.2044	0.1937	100.667	83.5782	232.628	287.939	1768.17	120600	1606.28	1500.21	267118	79.134	<247.52	302.97	1553.69	4.67	87.17	8.02	340.16	1554.2	1703.51	166.71		13.8234	1.28873
R3717_1_old_ol2_2	ol2	8	39.9049	44.3046	0.0544	0.2453	0.0158	15.5157	0.0346	0.2046	0.1933	100.473	83.5797	236.733	287.939	1753.16	120604	1607.85	1497.11	267157	94.721	<227.57	308.67	1406.61	4.04	74.75	7.52	353.35	1497.29	1695.72	164.42		13.6331	1.2415
R3717_1_old_ol2_1	ol2	7	39.7165	44.2684	0.0487	0.2534	0.016	15.4281	0.0352	0.2014	0.2078	100.175	83.6461	240.838	257.769	1811.05	119923	1582.7	1609.41	266938	95.92	<234.81	117.95	1460.58	4.67	82.6	8.68	324.33	1519.44	1685.4	160.2		13.3586	1.26702
R3717_1_old_ol10_5	ol10	53	39.8764	44.6944	0.0465	0.2137	0.0103	15.107	0.0404	0.2338	0.1726	100.395	84.0605	276.417	246.125	1527.31	117427	1837.32	1336.79	269507	61.7485
R3717_1_old_ol10_3	ol10	51	39.8366	44.9268	0.0504	0.2296	0.011	15.1369	0.0486	0.2315	0.1827	100.654	84.1034	332.521	266.767	1640.95	117659	1819.24	1415.01	270909	65.945	<257.99	139.33	1314.03	3.95	77.7	7.78	313.17	1345.87	1780.15	146.98		12.492	1.14387
R3717_1_old_ol9_3	ol9	46	39.8086	44.5664	0.2946	0.2324	0.0111	14.9896	0.0482	0.2346	0.1851	100.37	84.1265	329.784	1559.32	1660.96	116514	1843.6	1433.6	268735	66.5445	<313.13	102.55	1322.57	3.87	74.58	8.05	322.05	1441.88	1954.27	143.81		12.3427	1.23751
R3717_1_old_ol9_2	ol9	45	39.9363	44.5808	0.0733	0.2225	0.023	14.9448	0.0461	0.2403	0.1941	100.261	84.1707	315.416	387.977	1590.21	116166	1888.4	1503.3	268822	137.885	<324.90	473.86	1290.93	4.08	77.98	8.16	313.31	1378.68	1880.7	152.14		13.0968	1.18682
R3717_1_old_ol10_1	ol10	49	39.8856	44.7769	0.0521	0.2082	0.0037	14.9989	0.0401	0.2346	0.1791	100.379	84.1811	274.364	275.765	1488.01	116586	1843.6	1387.13	270005	22.1815	<247.90	312.68	1194.4	3.82	73.05	7.28	302.54	1372.68	1736.48	144.92		12.4303	1.17739
R3717_1_old_ol9_1	ol9	44	40.0475	44.733	0.0516	0.2175	0.0139	14.939	0.0509	0.2461	0.1814	100.481	84.2212	348.258	273.119	1554.47	116121	1933.98	1404.94	269740	83.3305	<282.50	334.08	1296.67	3.89	74.5	7.56	323.48	1398.35	1889.8	150.43		12.9546	1.20422
R3717_1_old_ol9_4	ol9	47	39.9696	44.725	0.0453	0.2135	0.0199	14.8694	0.0417	0.2434	0.195	100.323	84.2808	285.311	239.773	1525.88	115580	1912.76	1510.28	269692	119.3
R3717_1_old_ol9_5	ol9	48	39.9173	44.8651	0.0476	0.2163	0.0166	14.8799	0.0481	0.2422	0.1866	100.42	84.3129	329.1	251.947	1545.9	115661	1903.33	1445.22	270537	99.517
R3717_1_old_ol10_2	ol10	50	39.7785	44.9493	0.0525	0.2186	0.0213	14.9001	0.0464	0.2419	0.1883	100.397	84.3197	317.469	277.882	1562.33	115818	1900.97	1458.38	271044	127.694	<258.21	<0.00	1272.23	3.84	72.55	8.04	304.54	1397.44	1849.24	152.72		13.1862	1.20658
R3717_1_old_ol10_4	ol10	52	39.8361	44.846	0.0834	0.2252	0.0108	14.8641	0.0521	0.2385	0.1816	100.338	84.3213	356.468	441.436	1609.5	115539	1874.25	1406.49	270421	64.746
R3728_2_ol1_1	ol1 (1)	1	39.9999	44.3782	0.0606	0.2021	0.0008	15.1939	0.0424	0.2714	0.1798	100.329	83.8878	290.101	320.756	1444.41	118102	2132.8	1392.55	267601	4.796	<61.32	177.7	1139.43	4	57.11	8.48	337.49	1293.73	2236.79	153.94		13.0345	1.09543
R3728_2_ol1_10	ol1 (2)	10	39.8286	44.6139	0.0531	0.2217	0.0096	15.035	0.0499	0.2746	0.1739	100.26	84.1003	341.416	281.058	1584.49	116867	2157.94	1346.86	269022	57.552
R3728_2_ol1_2	ol1 (1)	2	39.6673	44.3373	0.0718	0.2147	0.0202	14.9684	0.0496	0.2841	0.1813	99.7947	84.0765	339.363	380.037	1534.46	116349	2232.6	1404.17	267354	121.099	<65.10	156.3	1202.54	4.01	61.94	8.31	350.5	1323.32	2273.24	161.47		13.878	1.13737
R3728_2_ol1_3	ol1 (1)	3	39.9167	44.2844	0.0584	0.2064	0.008	15.0779	0.0513	0.2773	0.1842	100.064	83.9626	350.995	309.111	1475.14	117201	2179.16	1426.63	267035	47.96	<67.39	143.06	1284.69	4.03	62.51	8.67	343.94	1345.67	2319.25	164.58		14.0426	1.14818
R3728_2_ol1_4	ol1 (1)	4	39.5062	43.6621	0.0691	0.2073	0.0176	16.2126	0.0589	0.2424	0.1972	100.173	82.7604	402.994	365.746	1481.57	126021	1904.9	1527.31	263282	105.512
R3728_2_ol1_5	ol1 (1)	5	39.4365	43.3148	0.0417	0.206	0.0181	16.4127	0.0341	0.2378	0.2034	99.9051	82.4695	233.312	220.718	1472.28	127576	1868.75	1575.33	261188	108.51
R3728_2_ol1_6	ol1 (2)	6	39.8852	44.7602	0.0568	0.2114	0.014	14.9202	0.09	0.2778	0.1953	100.411	84.246	615.78	300.642	1510.88	115975	2183.09	1512.6	269904	83.93	<66.20	135.3	1210.65	4.2	61.62	8.01	339.3	1317.14	2258.5	160.8		13.8651	1.13571
R3728_2_ol1_7	ol1 (2)	7	39.8521	44.6916	0.0523	0.1948	0.0102	15.0688	0.0441	0.2898	0.181	100.385	84.0936	301.732	276.824	1392.24	117130	2277.39	1401.85	269490	61.149	<65.60	287.1	1202.93	4	58.81	8.38	340.21	1309.92	2283.08	149.94		12.8012	1.11835
R3728_2_ol1_8	ol1 (2)	8	39.9912	44.8937	0.0502	0.2017	0.0168	14.9366	0.0475	0.2858	0.1816	100.605	84.271	324.995	265.709	1441.55	116102	2245.96	1406.49	270709	100.716	<69.08	<0.00	1158.29	3.83	60.38	8.59	346.13	1371.06	2314.72	155.67		13.408	1.18091
R3728_2_ol1_9	ol1 (2)	9	40.0032	44.7678	0.0455	0.2099	0.0125	14.9023	0.0406	0.2926	0.1707	100.445	84.2642	277.785	240.832	1500.16	115836	2299.4	1322.07	269950	74.9375
R3728_2_ol2_1	ol2	11	39.2562	42.0652	0.0339	0.2804	0.0106	17.7646	0.0371	0.1578	0.2164	99.822	80.8464	253.838	179.433	2004.02	138084	1240.07	1676.02	253653	63.547	135.32	74.94	1393.48	4.21	66.03	8.82	255.95	1540.68	1335.88	181.44		13.1398	1.11575
R3728_2_ol2_2	ol2	12	39.6274	42.1905	0.0418	0.2633	0.0047	17.7012	0.0399	0.1541	0.218	100.241	80.9476	272.996	221.247	1881.81	137591	1210.99	1688.41	254409	28.1765	<70.50	49.62	1373.39	4.63	64.5	10.18	257.3	1648.29	1359.07	191.94		13.95	1.19796
R3728_2_ol2_3	ol2	13	39.0966	42.2252	0.0291	0.2349	0.0124	17.8179	0.0362	0.1629	0.227	99.8422	80.8588	247.68	154.026	1678.83	138499	1280.15	1758.12	254618	74.338	<71.15	152.71	1416.34	4.64	66.92	8.15	255.04	1631.31	1380.58	191.79		13.8478	1.17785
R3728_2_ol2_4	ol2	14	39.1394	42.1753	0.0532	0.2399	0.0112	17.7838	0.0345	0.1578	0.22	99.8152	80.8701	236.049	281.588	1714.57	138233	1240.07	1703.9	254317	67.144
R3728_2_ol2_5	ol2	15	39.2076	42.2822	0.04	0.2726	0.0126	17.8204	0.0448	0.1622	0.2189	100.061	80.8775	306.522	211.72	1948.27	138518	1274.65	1695.38	254962	75.537
R3728_2_ol3_1	ol3	16	39.5064	42.1746	0.0356	0.2401	0.0131	18.0261	0.0422	0.1472	0.2182	100.403	80.6596	288.732	188.431	1715.99	140117	1156.77	1689.96	254313	78.5345	<69.36	451.64	1414.24	4.65	127.45	16.53	1405.78	1662.15	1251.96	195.94		13.984	1.18626
R3728_2_ol3_2	ol3	17	39.2645	42.0041	0.0295	0.2398	0.0187	18.0912	0.0465	0.1504	0.2165	100.061	80.5399	318.153	156.143	1713.85	140623	1181.92	1676.79	253285	112.107	<75.46	105.44	1399.79	4.71	71.88	10.67	360.74	1751.07	1401.51	188.97		13.4381	1.24522
R3728_2_ol3_3	ol3	18	39.2657	42.072	0.0344	0.2342	0.0114	17.9686	0.0421	0.1609	0.2346	100.024	80.6715	288.048	182.079	1673.83	139670	1264.43	1816.98	253694	68.343	338.13	386.16	1409.93	4.87	117.93	15.68	1406.42	1704.26	1294.63	182.58		13.0722	1.22021
R3728_2_ol3_4	ol3	19	39.2106	41.7312	0.1082	0.2649	-0.0009	17.9373	0.0423	0.1479	0.2193	99.6606	80.5716	289.417	572.703	1893.24	139427	1162.27	1698.48	251639	-5.3955
R3728_2_ol3_5	ol3	20	39.2695	42.0156	0.0361	0.2397	0.0097	18.0221	0.0571	0.155	0.2331	100.038	80.6041	390.678	191.077	1713.14	140086	1218.07	1805.36	253354	58.1515
R3728_2_ol4_1	ol4	21	39.4796	42.6818	0.0493	0.2323	0.0203	17.5008	0.0585	0.1715	0.2196	100.414	81.2992	400.257	260.945	1660.25	136034	1347.73	1700.8	257371	121.698	<68.95	145.31	1371.22	4.43	61.64	9.73	262.08	1558.48	1381.73	175.88		12.9291	1.14566
R3728_2_ol4_2	ol4	22	39.3445	42.6493	0.0455	0.2337	0.0092	17.3807	0.0426	0.1726	0.2242	100.102	81.3922	291.469	240.832	1670.25	135100	1356.38	1736.43	257175	55.154	<74.20	100.09	1487.53	4.9	74.7	8.12	305.32	1627.52	1664.06	186.67		13.8172	1.20468
R3728_2_ol4_3	ol4	23	39.3837	42.761	0.0502	0.2337	0.0034	17.5739	0.0414	0.1862	0.2147	100.448	81.264	283.259	265.709	1670.25	136602	1463.25	1662.85	257849	20.383	<73.45	131.82	1417.6	4.52	64.05	7.77	287.85	1600.1	1515.74	182.83		13.3841	1.17136
R3728_2_ol4_4	ol4	24	39.4636	42.2307	0.0431	0.2342	0.0123	17.2768	0.0404	0.1856	0.2182	99.7049	81.3335	276.417	228.128	1673.83	134293	1458.54	1689.96	254651	73.7385
R3728_2_ol4_5	ol4	25	39.3812	42.6662	0.0517	0.2394	0.0161	17.3569	0.0456	0.1859	0.2318	100.175	81.4189	311.995	273.648	1710.99	134915	1460.9	1795.29	257277	96.5195
R3728_2_ol5_1	ol5	26	39.4548	42.3691	0.0871	0.2217	0.0095	17.6823	0.0406	0.1765	0.2106	100.252	81.0291	277.785	461.02	1584.49	137445	1387.03	1631.1	255486	56.9525	101.23	458.73	1411.47	4.37	83.69	8.45	239.02	1484.91	1334.32	197.2		14.3476	1.08037
R3728_2_ol5_2	ol5	27	39.5354	42.4744	0.038	0.2226	0.0149	17.7653	0.032	0.1782	0.2128	100.474	80.9952	218.944	201.134	1590.92	138090	1400.38	1648.14	256121	89.3255	72.9	309.01	1314.27	4.19	64.65	7.66	244.82	1475.32	1416.04	172.13		12.4651	1.06838
R3728_2_ol5_3	ol5	28	39.4675	42.2912	0.062	0.2543	0.0161	17.8309	0.0332	0.1762	0.2169	100.348	80.8717	227.154	328.166	1817.48	138600	1384.67	1679.89	255016	96.5195	98.28	382.25	1431.38	4.67	67.89	8.53	230	1558.37	1441.47	184.26		13.2944	1.12437
R3728_2_ol5_4	ol5	29	39.3391	42.1324	0.0312	0.2206	0.013	17.8928	0.0464	0.1752	0.2315	100.082	80.7596	317.469	165.142	1576.63	139081	1376.81	1792.97	254058	77.935
R3728_2_ol5_5	ol5	30	39.3564	42.3487	0.048	0.2156	0.0099	17.8457	0.0417	0.1809	0.21	100.257	80.8798	285.311	254.064	1540.89	138715	1421.6	1626.45	255363	59.3505
R3728_3_ol1_1	ol1	1	39.4134	42.9897	0.0427	0.2351	0.0154	17.4514	0.1001	0.1996	0.2343	100.682	81.451	684.884	226.011	1680.26	135650	1568.56	1814.65	259228	92.323	65.16	215.22	1325	4.39	75.97	7.37	264.11	1471.7	1517.95	172.7		12.7313	1.08493
R3728_3_ol1_2	ol1	2	39.3562	42.7987	0.2487	0.2503	0.0123	16.4549	0.0457	0.2122	0.2154	99.5943	82.2581	312.679	1316.37	1788.89	127904	1667.57	1668.27	258076	73.7385	67.04	301.85	1357.94	4.41	78.75	8.01	299.19	1505.18	1697.66	162.11		12.6744	1.17681
R3728_3_ol1_3	ol1	3	39.7551	43.3689	0.0774	0.2539	0.0192	16.5023	0.0381	0.2155	0.2109	100.441	82.4087	260.68	409.678	1814.62	128272	1693.51	1633.42	261514	115.104	79.91	169.52	1388.6	4.42	80.34	7.83	306.35	1496.44	1652.65	167.3		13.0426	1.16661
R3728_3_ol1_4	ol1	4	39.4169	43.1309	0.0579	0.2433	0.0223	16.5958	0.0443	0.2072	0.2158	99.9344	82.2465	303.101	306.465	1738.87	128999	1628.28	1671.37	260079	133.689
R3728_3_ol1_5	ol1	5	39.1751	41.9918	0.0444	0.2386	0.0125	18.1687	0.036	0.1949	0.2472	100.109	80.4682	246.312	235.009	1705.27	141225	1531.62	1914.56	253211	74.9375
R3728_3_ol2_1	ol2	11	39.4398	42.0061	0.0547	0.2528	0.0149	17.9433	0.0383	0.1933	0.2284	100.172	80.669	262.049	289.527	1806.76	139473	1519.05	1768.96	253297	89.3255	63.78	196.1	1167.14	3.87	64.17	6.64	225.58	1409.2	1317.35	159.07		11.4051	1.01037
R3728_3_ol2_2	ol2	12	39.0052	41.6523	0.0672	0.248	0.0207	18.7022	0.0365	0.189	0.2511	100.172	79.8792	249.733	355.69	1772.46	145372	1485.26	1944.77	251163	124.096	67.72	271.63	1224.01	4.07	77.83	8.58	255.68	1518.82	1505.1	174.09		11.9755	1.04478
R3728_3_ol2_3	ol2	13	39.4328	41.9402	0.075	0.2485	0.0101	18.0242	0.0486	0.1986	0.2358	100.214	80.5742	332.521	396.975	1776.03	140102	1560.7	1826.27	252899	60.5495	64.3	198.14	1359.27	4.6	77.07	8.24	219.74	1582.07	1377.05	174.89		12.483	1.12923
R3728_3_ol2_4	ol2	14	39.2977	41.2765	0.0713	0.2563	0.0126	18.7755	0.0307	0.1797	0.24	100.14	79.6699	210.049	377.391	1831.78	145942	1412.17	1858.8	248897	75.537
R3728_3_ol2_5	ol2	15	39.1101	40.6398	0.082	0.2594	0.0146	19.5564	0.0355	0.1691	0.2671	100.134	78.7428	242.891	434.026	1853.93	152012	1328.87	2068.69	245058	87.527
R3728_3_ol3_1	ol3	16	38.8518	39.7994	0.0633	0.2881	0.0273	21.0847	0.0188	0.1018	0.2995	100.535	77.0891	128.63	335.047	2059.05	163891	799.995	2319.63	239990	163.663	51.3	79.82	1380.6	4.45	69	6.78	113.11	1699.59	887.32	176.15		10.748	1.03702
R3728_3_ol3_2	ol3	17	38.659	39.8925	0.0371	0.2582	0.0096	20.4971	0.0154	0.1104	0.2723	99.7516	77.6251	105.367	196.37	1845.36	159324	867.578	2108.96	240552	57.552	53.01	114.46	1485.89	4.63	78.67	6.64	136.99	1781.68	954.93	180.2		11.3103	1.11828
R3728_3_ol3_3	ol3	18	38.7527	40.2306	0.0486	0.2623	0.0101	20.0164	0.0238	0.1226	0.2445	99.7116	78.1789	162.84	257.24	1874.66	155587	963.452	1893.65	242591	60.5495	<48.17	161.97	1493.23	5.13	86.45	7.17	143.45	1923.83	1035.53	196.99		12.661	1.23649
R3728_3_ol3_4	ol3	19	38.9427	40.2549	0.0409	0.258	0.0183	20.2669	0.0229	0.1185	0.269	100.192	77.9764	156.682	216.484	1843.93	157535	931.232	2083.41	242737	109.709
R3728_3_ol3_5	ol3	20	38.6805	40.2114	0.0523	0.2486	0.0149	20.066	0.0141	0.119	0.2571	99.664	78.1285	96.4722	276.824	1776.74	155973	935.161	1991.24	242475	89.3255
R3728_3_ol4_1	ol4	26	39.2454	40.8301	0.0362	0.2474	0.0132	19.8914	0.0268	0.1193	0.2627	100.672	78.536	183.366	191.607	1768.17	154616	937.519	2034.61	246206	79.134	46.77	109.31	1461.77	4.83	81.32	6.43	140.3	1785.91	954.01	182.09		11.7769	1.15506
R3728_3_ol4_2	ol4	27	38.9378	40.8313	0.0421	0.2656	0.0066	20.1028	0.0241	0.1149	0.2636	100.589	78.3577	164.892	222.835	1898.24	156259	902.942	2041.58	246213	39.567	47.19	38.93	1532.46	5	87.8	7.98	144.4	1914.3	951.75	190.36		12.1823	1.22508
R3728_3_ol4_3	ol4	28	39.3796	40.7378	0.0318	0.2627	0.0156	20.1449	0.0281	0.1172	0.2545	100.972	78.2833	192.26	168.317	1877.52	156586	921.016	1971.1	245649	93.522	<46.81	196.06	1360.78	4.7	80.18	6.62	137.45	1846.77	918.79	177.29		11.3222	1.17939
R3728_3_ol4_4	ol4	29	39.2168	40.5868	0.0406	0.2639	0.0187	20.0905	0.017	0.1246	0.2616	100.62	78.2661	116.314	214.896	1886.09	156163	979.169	2026.09	244738	112.107
R3728_3_ol4_5	ol4	30	39.0843	40.9067	0.0683	0.2582	0.0232	19.8848	0.0084	0.1207	0.2644	100.619	78.5731	57.4728	361.512	1845.36	154565	948.521	2047.78	246667	139.084
R3728_3_ol5_1	ol5	31	38.881	40.4426	0.0519	0.2782	0.0162	20.1134	0.0216	0.1305	0.2631	100.198	78.1861	147.787	274.707	1988.3	156341	1025.53	2037.71	243869	97.119	182.37	479.2	1662.91	5.02	90.75	7.13	135.02	1917.01	956.59	199.19		12.7407	1.22617
R3728_3_ol5_2	ol5	32	39.0171	40.556	0.0432	0.2614	0.0216	19.9215	0.0282	0.1382	0.2618	100.249	78.3966	192.944	228.658	1868.23	154850	1086.04	2027.64	244553	129.492	<49.04	185.36	1619.84	5.23	89.55	7.96	134.99	1965.46	994.98	201.74		13.0281	1.26927
R3728_3_ol5_3	ol5	33	38.9254	40.5226	0.0355	0.2612	0.0101	20.071	0.0271	0.1186	0.2865	100.258	78.2557	185.418	187.901	1866.8	156012	932.018	2218.94	244351	60.5495	159.45	400.15	1600.57	5.05	83.59	7.46	149.83	1824.13	1013.26	199.58		12.7926	1.16923
R3728_3_ol5_5	ol5	35	39.084	40.6462	0.0307	0.2758	0.0275	20.2052	0.0224	0.1242	0.2709	100.687	78.1941	153.261	162.495	1971.14	157055	976.026	2098.12	245097	164.863
R3728_3_ol6_1	ol6	36	39.2346	41.429	0.0512	0.2576	0.0132	19.4708	0.037	0.1418	0.2617	100.897	79.1355	253.154	271.002	1841.07	151347	1114.34	2026.87	249817	79.134	<51.30	126.95	1479.54	5.24	80.9	8.51	190.77	1836.76	1116.3	187.03		12.3577	1.21361
R3728_3_ol6_2	ol6	37	38.9298	41.0697	0.0599	0.2508	0.0182	19.5929	0.0299	0.1387	0.2535	100.343	78.8874	204.576	317.051	1792.47	152296	1089.97	1963.36	247650	109.109	52.98	85.47	1455.73	5.22	79.59	7.66	176.24	1783.75	1041.5	178.4		11.7141	1.17124
R3728_3_ol6_3	ol6	38	38.965	40.4091	0.0341	0.2739	0.0125	20.1887	0.0161	0.1185	0.2702	100.288	78.1081	110.156	180.491	1957.56	156927	931.232	2092.7	243667	74.9375	53.97	122.99	1556.91	5.22	90.19	7.24	160.17	1807.04	996.62	182.89		11.6545	1.15152
R3728_3_ol6_4	ol6	39	39.1573	40.8197	0.0495	0.2574	0.0189	19.5484	0.0329	0.1271	0.2551	100.266	78.8235	225.102	262.004	1839.64	151950	998.815	1975.75	246143	113.305
R3728_3_ol6_5	ol6	40	39.1397	41.1569	0.0538	0.2549	0.0124	19.3841	0.0325	0.1436	0.2484	100.426	79.1003	222.365	284.763	1821.77	150673	1128.48	1923.86	248176	74.338
R3729_1_new_ol1_1	ol1	1	39.1041	41.6162	0.0494	0.246	0.0186	18.9682	0.0377	0.1788	0.2426	100.462	79.6372	257.943	261.474	1758.16	147440	1405.1	1878.94	250946	111.507	<233.69	314.04		4.64	83.83	8.65	234.78	1761.14	1493.34	219.22		14.8684	1.19448
R3729_1_new_ol1_2	ol1	2	39.0008	41.4285	0.038	0.2376	0.0118	18.8601	0.0645	0.184	0.2396	100.065	79.6566	441.309	201.134	1698.13	146600	1445.96	1855.7	249814	70.741	<201.98	268.19		4.76	85.37	8.34	223.81	1729.51	1426.12	201.51		13.7456	1.17975
R3729_1_new_ol1_3	ol1	3	39.0646	41.4602	0.0548	0.2415	0.0213	18.9143	0.0687	0.1848	0.228	100.238	79.6224	470.045	290.056	1726	147021	1452.25	1765.86	250005	127.694	<182.51	126.37		5.24	96.14	8.24	232.63	1786.18	1546.03	205.68		13.9899	1.21492
R3729_1_new_ol1_4	ol1	4	39.0709	41.4647	0.0487	0.2521	0.01	19.0431	0.0375	0.1838	0.2392	100.35	79.5139	256.575	257.769	1801.76	148022	1444.39	1852.6	250032	59.95
R3729_1_new_ol1_5	ol1	5	39.0818	41.3168	0.0485	0.245	0.028	18.6914	0.0924	0.1835	0.2327	99.9202	79.7582	632.201	256.711	1751.01	145288	1442.03	1802.26	249140	167.86
R3729_1_new_ol2_2	ol2	7	38.9045	41.0733	0.0391	0.266	0.0227	19.3839	0.0333	0.1561	0.2389	100.118	79.0669	227.839	206.956	1901.1	150671	1226.71	1850.28	247672	136.087	<209.48	708.12		5.09	140.92	13.98	811.74	1781.57	1259.36	198.48		13.1731	1.18242
R3729_1_new_ol2_4	ol2	9	39.2967	41.1647	0.037	0.266	0.0183	19.391	0.0367	0.1746	0.2434	100.628	79.0976	251.101	195.841	1901.1	150726	1372.09	1885.13	248223	109.709
R3729_1_new_ol2_1	ol2	6	39.4257	41.1239	0.0434	0.2692	0.0226	19.533	0.0368	0.1482	0.238	100.841	78.9602	251.786	229.716	1923.97	151830	1164.63	1843.31	247977	135.487	<211.44	144.66		5.32	94.99	7.9	201.75	1817.65	1372.09	216.56		14.2633	1.19716
R3729_1_new_ol2_3	ol2	8	39.3556	41.3315	0.0356	0.2704	0.0238	19.4965	0.0358	0.1497	0.2657	100.965	79.0747	244.944	188.431	1932.55	151546	1176.42	2057.85	249229	142.681	<208.80	<0.00		5.29	81.15	7.65	196.52	1836.24	1249.55	207.32		13.6803	1.21167
R3729_1_new_ol2_5	ol2	10	39.2664	41.0582	0.0502	0.2707	0.0257	19.3768	0.0347	0.1486	0.2493	100.481	79.0669	237.417	265.709	1934.69	150616	1167.77	1930.83	247581	154.072
R3729_1_new_ol2_rim	ol2-rim	11	38.8576	41.1339	0.0406	0.2867	0.0262	19.568	0.0327	0.139	0.2494	100.334	78.9345	223.733	214.896	2049.04	152102	1092.33	1931.6	248037	157.069
R3729_1_new_ol3_1	ol3	12	39.0439	41.0146	0.0518	0.2536	0.0099	19.353	0.0689	0.1523	0.2381	100.186	79.0696	471.414	274.177	1812.48	150431	1196.85	1844.08	247318	59.3505	<55.54	36.67		1.61	26.06	2.9	67.88		430.53
R3729_1_new_ol3_2	ol3	13	39.2894	41.1153	0.0491	0.2578	0.019	19.317	0.1029	0.1497	0.243	100.543	79.1409	704.042	259.886	1842.5	150151	1176.42	1882.03	247925	113.905	<191.02	121.25		4.59	84.78	7.42	183	1724.25	1124.72	183.32		12.209	1.14834
R3729_1_new_ol3_3	ol3	14	39.2701	41.1747	0.0487	0.2554	0.0172	19.305	0.0416	0.1525	0.247	100.512	79.175	284.627	257.769	1825.34	150058	1198.42	1913.01	248283	103.114	<163.66	189.93		5.13	218.24	55.65	457.18	1958.41	1283.68	197.14		13.1376	1.3051
R3729_1_new_ol3_4	ol3	15	39.0469	41.2697	0.0527	0.2591	0.0185	19.1819	0.0421	0.1501	0.2412	100.262	79.3181	288.048	278.941	1851.79	149101	1179.56	1868.09	248856	110.907
R3729_1_new_ol3_5	ol3	16	38.8773	41.2662	0.0386	0.2667	0.0152	19.1442	0.0354	0.1442	0.2431	100.031	79.349	242.207	204.31	1906.1	148808	1133.2	1882.81	248835	91.124
R3729_1_new_ol4_1	ol4	17	39.1054	42.1499	0.0616	0.2413	0.0091	17.399	0.0446	0.2184	0.2209	99.4502	81.1971	305.153	326.049	1724.57	135242	1716.3	1710.87	254164	54.5545	245.62	320.92		4.18	127.1	9.84	285.87	1550.44	1792.43	181.67		13.4329	1.14642
R3729_1_new_ol4_2	ol4	18	37.0024	39.3422	0.3104	0.2655	0.0172	17.5335	0.0508	0.2029	0.2201	94.945	79.999	347.574	1642.95	1897.53	136288	1594.49	1704.67	237233	103.114	<174.25	<0.00		3.86	76.01	9.31	300.87	1603.4	1875.24	191.86		14.0776	1.17648
R3729_1_new_ol4_3	ol4	19	39.9689	43.0933	0.0916	0.2427	0.0171	17.8156	0.0461	0.2035	0.2228	101.702	81.1737	315.416	484.839	1734.58	138481	1599.2	1725.59	259853	102.514	<168.91	298.85		4.05	70.03	9.38	345.2	1594.57	1762.22	184.88		13.3506	1.15147
R3729_1_new_ol4_4	ol4	20	39.0461	42.1306	0.0426	0.2407	0.0179	17.8908	0.0437	0.2114	0.2326	99.8564	80.7607	298.995	225.482	1720.28	139065	1661.29	1801.49	254048	107.31
R3729_1_new_ol4_5	ol4	21	39.4465	42.3994	0.039	0.2418	0.0155	17.389	0.0439	0.2157	0.2173	100.008	81.2957	300.364	206.427	1728.14	135165	1695.08	1682.99	255668	92.9225
R3729_1_new_ol5_1	ol5	22	39.6657	44.069	0.2206	0.2528	0.0094	17.1084	0.0437	0.2196	0.205	101.794	82.1161	298.995	1167.64	1806.76	132984	1725.73	1587.72	265736	56.353	<79.02	134.65	1280.32	4.24	70.72	8.71	281.71	1513.95	1880.03	190.93		14.3574	1.13845
R3729_1_new_ol5_2	ol5	23	39.066	41.7699	0.0583	0.2366	0.0087	17.4546	0.0479	0.2121	0.208	99.062	81.0094	327.732	308.582	1690.98	135675	1666.79	1610.96	251872	52.1565	<79.91	199.98	1311.46	4.47	71.33	8.45	300.43	1629.7	1949.81	191.92		14.1456	1.20118
R3729_1_new_ol5_3	ol5	24	39.4555	42.4757	0.0402	0.2264	0.0112	17.8661	0.0368	0.2068	0.2231	100.542	80.9085	251.786	212.779	1618.08	138873	1625.14	1727.91	256128	67.144	<70.50	98.46	1277.64	3.96	74.36	8.24	283.2	1487.34	1829.22	173.04		12.4603	1.07101
R3729_1_new_ol5_4	ol5	25	39.5256	42.5826	0.0448	0.2265	0.0129	17.4314	0.0371	0.2295	0.1975	100.288	81.3243	253.838	237.126	1618.8	135494	1803.53	1529.64	256773	77.3355
R3729_1_new_ol5_5	ol5	26	39.5869	42.8003	0.0446	0.2269	0.0178	17.519	0.0473	0.2463	0.2043	100.694	81.3256	323.627	236.068	1621.65	136175	1935.55	1582.3	258086	106.711
R3729_1_new_ol6_1	ol6	27	39.1197	41.6974	0.0426	0.244	0.0216	19.0389	0.0266	0.1734	0.2556	100.62	79.6085	181.997	225.482	1743.87	147989	1362.66	1979.62	251435	129.492	328.8	889.84	2295.22	4.44	277.84	12.83	233.43	1674.53	1462.39	185.39		12.5273	1.13152
R3729_1_new_ol6_2	ol6	28	39.154	41.5199	0.0441	0.2893	0.0153	19.1718	0.0236	0.1666	0.2395	100.624	79.4257	161.471	233.421	2067.63	149022	1309.23	1854.93	250365	91.7235	85.21	255.07	1423.05	4.15	119.57	8.74	205.89	1630.93	1350.58	183.17		12.2914	1.09442
R3729_1_new_ol6_3	ol6	29	39.1723	41.4972	0.0505	0.253	0.0175	18.9789	0.0303	0.1731	0.2467	100.419	79.5816	207.313	267.297	1808.19	147523	1360.31	1910.69	250228	104.913	81.1	390.64	1436.02	4.68	103.56	9.01	253.83	1681.87	1602.15	183.46		12.436	1.14007
R3729_1_new_ol6_4	ol6	30	39.4116	42.2553	0.0566	0.2576	0.0207	18.3971	0.0245	0.1763	0.2428	100.843	80.37	167.629	299.584	1841.07	143001	1385.45	1880.49	254799	124.096
R3729_1_new_ol6_5	ol6	31	39.0878	42.1358	0.0554	0.2475	0.0299	18.3688	0.0376	0.1617	0.2381	100.363	80.3496	257.259	293.232	1768.88	142781	1270.72	1844.08	254079	179.25
R3729_1_old_ol1_1	ol1	1	39.4821	42.6009	0.0418	0.2313	0.019	17.5814	0.0288	0.2475	0.2145	100.447	81.2003	197.05	221.247	1653.1	136660	1944.98	1661.3	256883	113.905	150.18	348.38	1407.63	4.58	82.11	8.06	263.83	1488.97	1898.52	164.68		12.0503	1.08954
R3729_1_old_ol1_2	ol1	2	39.5415	42.7733	0.0449	0.2284	0.0217	17.3604	0.0395	0.2483	0.2093	100.467	81.4538	270.259	237.656	1632.37	134942	1951.27	1621.03	257923	130.091	117.69	199.14	1369.31	4.34	78.58	8.22	262.58	1492.01	1931.39	162.81		12.0651	1.10566
R3729_1_old_ol1_3	ol1	3	39.7615	42.864	0.0476	0.2298	0.0166	17.3979	0.0399	0.2441	0.212	100.813	81.4532	272.996	251.947	1642.38	135234	1918.26	1641.94	258470	99.517	80.06	283.53	1218.69	3.83	67.67	7.94	246.73	1464.78	1810.36	146.51		10.8338	1.08315
R3729_1_old_ol1_4	ol1	4	39.4832	42.5735	0.0517	0.2304	0.0171	17.6597	0.0414	0.2475	0.2038	100.508	81.1226	283.259	273.648	1646.67	137269	1944.98	1578.43	256718	102.514
R3729_1_old_ol1_5	ol1	5	39.7197	42.7205	0.0427	0.2249	0.0181	17.3727	0.0383	0.2517	0.196	100.585	81.4244	262.049	226.011	1607.36	135038	1977.98	1518.02	257605	108.51
R3729_1_old_ol2_1	ol2	6	39.5936	43.0146	0.0429	0.2192	0.0112	17.0184	0.0417	0.2355	0.2096	100.387	81.8362	285.311	227.07	1566.62	132284	1850.68	1623.35	259378	67.144	70.21	156.59	1044.43	3.49	58.69	7.58	261.76	1363.58	1779.82	152.91		11.5592	1.0308
R3729_1_old_ol2_2	ol2	7	39.3747	43.1071	0.049	0.2279	0.0121	16.9805	0.0426	0.2323	0.2043	100.23	81.9012	291.469	259.357	1628.8	131989	1825.53	1582.3	259936	72.5395	<68.42	345.47	1120.05	3.72	62.8	8.32	261.88	1394.38	1834.13	162.15		12.2851	1.05643
R3729_1_old_ol2_3	ol2	8	39.6501	43.1348	0.0458	0.2213	0.0139	16.887	0.046	0.2416	0.2082	100.449	81.9924	314.732	242.419	1581.63	131263	1898.61	1612.51	260103	83.3305	80.57	277.88	1083	3.71	60.62	8.53	285.99	1533.25	1888.16	171.58		13.0715	1.16808
R3729_1_old_ol2_4	ol2	9	39.4449	41.8535	0.0495	0.2628	0.0255	18.7161	0.0274	0.1676	0.2244	100.772	79.9446	187.471	262.004	1878.23	145480	1317.08	1737.98	252377	152.873
R3729_1_old_ol2_5	ol2	10	39.7903	42.6421	0.0481	0.2345	0.0166	17.6111	0.043	0.2356	0.2046	100.826	81.1893	294.206	254.593	1675.97	136891	1851.46	1584.63	257132	99.517
R3729_1_old_ol3_1	ol3	11	39.2353	41.2915	0.0352	0.2586	0.0239	19.349	0.0321	0.1593	0.25	100.635	79.1842	219.628	186.314	1848.21	150400	1251.86	1936.25	248988	143.281	<72.74	168.08	1250.89	4.2	75.75	7.26	190.25	1652.09	1229.88	171.35		11.393	1.09847
R3729_1_old_ol3_2	ol3	12	38.8303	41.1559	0.0503	0.267	0.0231	19.2266	0.0524	0.1462	0.2452	99.9971	79.2345	358.521	266.238	1908.25	149448	1148.91	1899.07	248170	138.484	<73.37	34.38	1281.21	4.42	72.6	7.83	187.66	1654.44	1248.55	176.53		11.8121	1.10703
R3729_1_old_ol3_3	ol3	13	39.1001	41.3659	0.3464	0.2637	0.0121	19.306	0.0326	0.1531	0.2352	100.815	79.2504	223.049	1833.5	1884.66	150066	1203.14	1821.62	249436	72.5395	<73.94	1066.1	1275.19	4.13	197.95	24.57	1692.25	1648.21	1243.7	176.73		11.7769	1.09833
R3729_1_old_ol3_4	ol3	14	39.2906	41.3375	0.0369	0.2549	0.0191	19.2427	0.0393	0.1652	0.2413	100.627	79.2931	268.891	195.312	1821.77	149574	1298.22	1868.87	249265	114.504
R3729_1_old_ol3_5	ol3	15	39.274	41.6082	0.0406	0.2582	0.0243	19.2511	0.0374	0.1624	0.2451	100.901	79.3929	255.891	214.896	1845.36	149639	1276.22	1898.3	250897	145.678
R3729_1_old_ol4_1	ol4	16	39.1462	41.7098	0.2008	0.2331	0.0315	18.5857	0.295	0.1778	0.2379	100.618	80.0015	2018.39	1062.83	1665.97	144467	1397.24	1842.54	251510	188.843	<74.13	65.46	1108.41	3.32	30.23	5.54	208.64	1477.76	1515.38	164.74		11.4033	1.02291
R3729_1_old_ol4_2	ol4	17	39.478	41.9323	0.034	0.2512	0.0059	18.2906	0.0229	0.1974	0.2248	100.437	80.3405	156.682	179.962	1795.33	142173	1551.27	1741.08	252852	35.3705	<74.86	357.98	1168.26	4.12	74.45	7.94	244.24	1511.88	1502.48	160.21		11.2687	1.06341
R3729_1_old_ol4_3	ol4	18	39.3658	42.0262	0.0164	0.2327	0.0103	18.3181	0.0239	0.1947	0.2236	100.412	80.3521	163.524	86.8052	1663.11	142387	1530.05	1731.78	253418	61.7485	95.8	262.92	1259.68	3.59	45.42	6.54	247.39	1536.51	1624.08	170.41		11.9681	1.07911
R3729_1_old_ol4_4	ol4	19	39.4222	41.5854	0.0394	0.2945	0.0417	18.7697	0.0302	0.1524	0.2367	100.572	79.7953	206.628	208.544	2104.79	145897	1197.64	1833.24	250760	249.992
R3729_1_old_ol4_5	ol4	20	39.239	41.4134	0.0192	0.2552	0.0053	18.595	0.0203	0.1712	0.2218	99.9404	79.8791	138.893	101.626	1823.91	144539	1345.38	1717.84	249723	31.7735
R3729_1_old_ol5_1	ol5	21	39.0847	41.7647	0.0456	0.252	0.0229	18.8585	0.0474	0.1902	0.2393	100.505	79.7886	324.311	241.361	1801.04	146587	1494.69	1853.38	251841	137.286	1307.38	3019.61	2910.15	4.37	509.63	16.77	194.1	1518.07	1122.42	161.09		10.9894	1.03561
R3729_1_old_ol5_2	ol5	22	39.3116	41.2481	0.0398	0.2558	0.0273	18.9973	0.0314	0.1611	0.257	100.329	79.4678	214.839	210.661	1828.2	147666	1266	1990.47	248726	163.663	86.74	156.54	1022.29	3.39	79.64	7.61	211.88	1494.59	1259.76	157.52		10.6673	1.01214
R3729_1_old_ol5_3	ol5	23	39.1212	41.5771	0.0432	0.2406	0.0202	19.0571	0.0427	0.1563	0.2525	100.511	79.546	292.153	228.658	1719.57	148131	1228.28	1955.61	250710	121.099	<84.67	134.52	1148.51	4.07	71.69	8.65	229.2	1640.08	1318.33	166.63		11.2488	1.10718
R3729_1_old_ol5_4	ol5	24	39.1124	41.539	0.0422	0.2491	0.0277	19.0003	0.0288	0.1612	0.2464	100.407	79.5796	197.05	223.365	1780.32	147689	1266.79	1908.37	250480	166.061
R3729_1_old_ol5_5	ol5	25	39.1637	41.6427	0.0874	0.254	0.0317	18.7852	0.0346	0.1824	0.2534	100.435	79.8042	236.733	462.608	1815.34	146017	1433.39	1962.58	251105	190.041
R3733_5_new_ol1_1	ol1	1	38.7731	41.4899	0.0531	0.2529	0.0251	19.0445	0.038	0.2112	0.2531	100.141	79.5226	259.996	281.058	1807.48	148033	1659.72	1960.26	250184	150.475	69.78	155.55	1527.62	4.64	102.14	7.34	212.82	1740.62	1576.86	170.12		11.492	1.17583
R3733_5_new_ol1_2	ol1	2	38.4326	39.7724	0.034	0.3187	0.0489	21.2623	0.0202	0.138	0.308	100.335	76.9286	138.208	179.962	2277.75	165272	1084.47	2385.46	239828	293.156	70.03	38.13	1513.66	4.43	101.32	6.18	216.65	1723.99	1585.75	169.58		10.2607	1.04312
R3733_5_new_ol1_3	ol1	3	38.7519	41.2393	0.0443	0.2594	0.0247	19.572	0.0183	0.1762	0.2579	100.344	78.9737	125.209	234.48	1853.93	152133	1384.67	1997.44	248673	148.077	62.8	204.25	1510.68	4.54	100.42	7.4	205.51	1763.83	1583.4	167.66		11.0206	1.1594
R3733_5_new_ol2_1	ol2	4	39.0056	41.5841	0.0406	0.2609	0.0171	19.1515	0.0297	0.1858	0.2551	100.53	79.4682	203.207	214.896	1864.65	148865	1460.11	1975.75	250752	102.514	61.35	<141.66	1615.79	5.3	108.65	7.98	184.48	1869.39	1418.47	178.01		11.9578	1.25577
R3733_5_new_ol2_2	ol2	5	38.809	40.8683	0.045	0.2746	0.0205	19.5981	0.0247	0.1744	0.2695	100.084	78.8009	168.997	238.185	1962.57	152336	1370.52	2087.28	246436	122.898	63.08	224.29	1643.11	5.11	104.93	9.27	190.18	1829.05	1434.6	145.8		9.57095	1.20067
R3733_5_new_ol2_3	ol2	6	39.0868	41.5893	0.0443	0.2677	0.0172	19.1631	0.0314	0.1815	0.2665	100.648	79.4604	214.839	234.48	1913.25	148955	1426.32	2064.04	250783	103.114	55.69	264.38	1592.79	4.39	89.98	6.86	165.34	1828.94	1397.76	171.9		11.5404	1.22785
R3733_5_new_ol3_1	ol3	7	39.4519	42.7528	0.0584	0.2378	0.0084	16.9827	0.0372	0.2613	0.2215	100.012	81.7766	254.522	309.111	1699.56	132007	2053.43	1715.52	257799	50.358	53.23	89.87	1373.61	3.91	85.79	7.32	219.97	1611	1807.52	160.68		12.1721	1.22039
R3733_5_new_ol3_2	ol3	8	39.4067	43.0086	0.0523	0.2386	0.0146	17.29	0.0275	0.2642	0.2281	100.531	81.5976	188.155	276.824	1705.27	134395	2076.22	1766.63	259342	87.527	93.75	132.51	1219.43	3.64	77.03	7.24	233.2	1538.96	1921	149.85		11.15	1.1451
R3733_5_new_ol3_3	ol3	9	39.0121	42.1592	0.0501	0.2429	0.0248	18.1578	0.0414	0.2299	0.2319	100.15	80.5401	283.259	265.179	1736.01	141141	1806.67	1796.07	254220	148.676	60.4	216.54	1443.2	4.01	96.55	7.8	243.47	1675.8	1885.85	166.43		11.7918	1.18733
R3733_5_new_ol4_1	ol4	10	39.6985	43.7022	0.0564	0.2579	0.0171	16.5421	0.0381	0.2468	0.2126	100.772	82.4847	260.68	298.525	1843.21	128582	1939.48	1646.59	263524	102.514	74.75	222.37	1564.92	4.4	102.76	7.71	276.28	1620.66	2084.09	157.73		12.2669	1.26041
R3733_5_new_ol4_2	ol4	11	39.7511	43.7013	0.0509	0.2604	0.0141	16.4363	0.04	0.2581	0.2165	100.728	82.5769	273.68	269.414	1861.08	127759	2028.28	1676.79	263519	84.5295	74.32	204.81	1566.68	4.04	92.64	7.13	267.81	1571.46	2030.63	152.3		11.9208	1.23002
R3733_5_new_ol4_3	ol4	12	39.678	43.7297	0.0562	0.2537	0.0192	16.4752	0.0373	0.2518	0.2146	100.716	82.5522	255.207	297.467	1813.19	128062	1978.77	1662.08	263690	115.104	70.78	42.82	1433.3	3.94	87.72	7.19	249.91	1517.91	1968.53	147.49		11.5171	1.1853
R3733_5_old_ol1_1	ol1	1	39.4228	43.0661	0.0454	0.2411	0.02	17.4753	0.0325	0.2435	0.2232	100.77	81.4572	222.365	240.302	1723.14	135836	1913.54	1728.68	259689	119.9	<81.38	381.71	1548.32	4.6	92.65	7.52	231.52	1699.52	1797.12	194.88		14.3468	1.25116
R3733_5_old_ol1_2	ol1	2	39.2788	42.6201	0.0421	0.2435	0.0159	17.886	0.0416	0.2203	0.2405	100.589	80.9437	284.627	222.835	1740.29	139028	1731.23	1862.67	256999	95.3205	<89.40	273.51	1637.23	4.77	97.7	8.11	222.22	1818.1	1758.9	202.49		14.5647	1.30772
R3733_5_old_ol1_3	ol1	3	39.367	42.809	0.0446	0.2441	0.0166	17.7944	0.0256	0.2319	0.2425	100.776	81.0906	175.155	236.068	1744.58	138316	1822.39	1878.16	258138	99.517	<85.81	113.26	1591.41	4.82	96.58	7.36	246.13	1711.98	1983.85	202.55		14.644	1.23773
R3733_5_old_ol2_1	ol2	7	39.5443	42.3421	0.0455	0.2543	0.0191	18.0622	0.0359	0.2254	0.2448	100.773	80.6902	245.628	240.832	1817.48	140397	1771.31	1895.98	255323	114.504	<86.39	318.91	1554.4	4.86	91.35	7.29	237.9	1724.23	1874.18	203.01		14.4597	1.22811
R3733_5_old_ol2_2	ol2	8	39.3924	42.1397	0.0437	0.2516	0.0194	17.891	0.0373	0.2344	0.2319	100.241	80.7639	255.207	231.304	1798.19	139067	1842.03	1796.07	254102	116.303	<89.71	251.33	1590.1	4.94	91.19	9.4	243.02	1758.83	1914.91	205.55		14.7807	1.26474
R3733_5_old_ol2_3	ol2	9	39.393	42.1428	0.035	0.2523	0.0248	18.1545	0.0271	0.2386	0.2351	100.503	80.5368	185.418	185.255	1803.19	141115	1875.04	1820.85	254121	148.676	<84.73	93.9	1479.71	4.33	87.6	7.7	221.72	1655.75	1906.19	189.35		13.4181	1.17333
R3736_6_ol1_1	ol1	1	39.7805	43.4116	0.0558	0.2454	0.0184	16.7014	0.0367	0.2514	0.2234	100.725	82.2486	251.101	295.349	1753.87	129820	1975.63	1730.23	261772	110.308	63.13	112.41	1427.66	4.5	73.41	7.15	261.86	1467.77	1915.72	156.34		12.0428	1.13062
R3736_6_ol1_2	ol1	2	39.4076	43.3238	0.0446	0.2288	0.0156	16.6647	0.0369	0.2515	0.2173	100.191	82.2511	252.47	236.068	1635.23	129535	1976.41	1682.99	261243	93.522	61.2	260.93	1369.56	4.34	69.35	6.59	239.97	1425.8	1752.36	142.72		11.0179	1.10071
R3736_6_ol1_3	ol1	3	39.3067	43.3916	0.0446	0.2241	0.0209	16.7643	0.0383	0.2364	0.2215	100.248	82.1869	262.049	236.068	1601.64	130309	1857.75	1715.52	261651	125.295	68.45	334.94	1414.14	4.58	77.5	7.26	267	1430.8	1884.53	150.56		11.5541	1.09801
R3736_6_ol1_4	ol1	4	39.5174	43.042	0.0732	0.2363	0.0267	16.8043	0.0375	0.2427	0.2161	100.196	82.033	256.575	387.448	1688.84	130620	1907.26	1673.69	259543	160.067
R3736_6_ol1_5	ol1	5	39.4839	43.3037	0.0653	0.236	0.0142	16.5646	0.0462	0.2609	0.2096	100.184	82.3322	316.1	345.633	1686.69	128757	2050.28	1623.35	261121	85.129
R3736_6_ol2_1	ol2	6	39.5957	43.8181	0.057	0.2239	0.0091	15.7242	0.0355	0.2848	0.1773	99.9255	83.2422	242.891	301.701	1600.21	122224	2238.1	1373.19	264223	54.5545	69.49	274.77	1289.71	4.07	70.13	7.21	268.61	1344.51	2100.78	138.62		11.3415	1.10004
R3736_6_ol2_2	ol2	7	39.5319	44.0439	0.0577	0.2263	0.0082	15.8524	0.0372	0.293	0.2092	100.26	83.2006	254.522	305.406	1617.37	123221	2302.54	1620.25	265585	49.159	66.7	280.42	1405.43	4.48	75.36	7.63	281.75	1456.2	2046.78	138.34		11.227	1.18178
R3736_6_ol2_3	ol2	8	39.5303	43.8952	0.0758	0.2481	0.0192	15.637	0.0415	0.2822	0.2001	99.9294	83.3441	283.943	401.209	1773.17	121546	2217.67	1549.77	264688	115.104	60.62	243.66	1213.86	3.82	66.53	7.1	262.37	1318.02	1977.49	132.87		10.9316	1.08438
R3736_6_ol2_4	ol2	9	39.4808	43.5015	0.1482	0.2669	0.0229	15.929	0.0446	0.273	0.1959	99.8628	82.9587	305.153	784.423	1907.53	123816	2145.37	1517.25	262314	137.286
R3738_1_ol1_1	ol1	1	39.1234	41.8729	0.0457	0.2429	0.024	18.6803	0.0396	0.1385	0.2354	100.403	79.9827	270.943	241.89	1736.01	145202	1088.4	1823.17	252494	143.88	51.44	150.59	1395.31	5.12	75.75	8.38	235.76	1686.55	1161.56	187.7		12.9268	1.16152
R3738_1_ol1_2	ol1	2	39.2698	41.7101	0.0424	0.247	0.0197	18.7758	0.0419	0.1289	0.2359	100.472	79.8383	286.68	224.423	1765.31	145944	1012.96	1827.05	251512	118.101	43.28	35.06	1499.78	5.2	76.36	10.91	235.3	1636.07	1075.8	181.23		12.4178	1.12102
R3738_1_ol1_3	ol1	3	39.217	41.637	0.049	0.247	0.0212	18.8516	0.0769	0.1325	0.2399	100.472	79.7451	526.15	259.357	1765.31	146533	1041.25	1858.03	251071	127.094	47.4	237.62	1447.6	4.98	78.26	7.82	214.6	1666.33	1124.52	181.09		12.3583	1.13717
R3738_1_ol1_4	ol1	4	39.4787	41.4728	0.0526	0.251	0.0247	18.836	0.1163	0.1349	0.2291	100.596	79.6946	795.725	278.412	1793.9	146412	1060.11	1774.38	250081	148.077
R3738_1_ol1_5	ol1	5	39.2862	41.7009	0.0422	0.2514	0.0148	18.6787	0.0238	0.148	0.2415	100.388	79.9181	162.84	223.365	1796.76	145190	1163.06	1870.42	251456	88.726
R3738_1_ol2_1	ol2	6	39.1494	41.1332	0.0945	0.245	0.0247	19.0886	0.032	0.1415	0.2482	100.157	79.3437	218.944	500.188	1751.01	148376	1111.98	1922.31	248033	148.077	<241.31	<0.00		5.73	93.22	8.45	193.66	1937.39	1228.5	233.77		15.7553	1.30573
R3738_1_ol2_2	ol2	7	39.295	40.9815	0.04	0.235	0.0168	19.1259	0.035	0.1317	0.2214	100.082	79.251	239.47	211.72	1679.54	148666	1034.96	1714.74	247118	100.716	1078.23	3553.75	3402.34	5.4	606.06	17.18	187.48	1825.21	1139.67	214.23		14.4102	1.22773
R3738_1_ol2_3	ol2	8	38.9643	41.0775	0.0537	0.2484	0.0124	19.1234	0.0407	0.1367	0.2537	99.9107	79.2916	278.469	284.234	1775.31	148646	1074.26	1964.91	247697	74.338	<181.37	494.96		5.43	91.85	8.4	189.17	1882.48	1153.35	214.6		14.437	1.26642
R3738_1_ol2_4	ol2	9	39.3236	41.2424	0.0372	0.2387	0.0118	19.1276	0.029	0.1293	0.2573	100.397	79.3537	198.418	196.9	1705.99	148679	1016.1	1992.79	248692	70.741
R3738_1_ol2_5	ol2	10	39.2129	41.0682	0.0354	0.2447	0.0144	19.1123	0.0337	0.1343	0.2414	100.097	79.2974	230.575	187.372	1748.87	148560	1055.4	1869.64	247641	86.328
R3738_1_ol3_1	ol3	11	39.5838	41.3083	0.0476	0.2547	0.0141	19.2548	0.0308	0.1369	0.2392	100.87	79.2712	210.734	251.947	1820.34	149668	1075.83	1852.6	249089	84.5295	<46.71	133.58	1381.22	4.91	79.03	8.09	192.68	1770.18	1080.47	201.35		13.4531	1.18274
R3738_1_ol3_2	ol3	12	39.1998	41.0369	0.0668	0.2588	0.0193	19.1443	0.025	0.1317	0.2634	100.146	79.2574	171.05	353.572	1849.64	148809	1034.96	2040.03	247453	115.704	51.63	212.36	1412.43	5.15	86.64	8.88	197.17	1854.55	1108.87	198.9		13.3662	1.24626
R3738_1_ol3_3	ol3	13	39.1152	41.1092	0.0517	0.2669	0.0121	19.3805	0.0345	0.137	0.2539	100.361	79.0842	236.049	273.648	1907.53	150645	1076.61	1966.46	247888	72.5395	52.9	170.71	1413.09	5.51	89.97	8.68	206.34	1780.74	1133.12	197.8		13.1302	1.18208
R3738_1_ol3_4	ol3	14	39.2589	41.344	0.1037	0.2548	0.0167	19.2986	0.1098	0.1336	0.2518	100.772	79.248	751.252	548.884	1821.06	150008	1049.9	1950.19	249304	100.117
R3738_1_ol3_5	ol3	15	39.5464	41.4269	0.0462	0.254	0.0149	19.3043	0.0388	0.1332	0.2609	101.026	79.2761	265.47	244.537	1815.34	150052	1046.75	2020.67	249804	89.3255
R3738_1_ol3_rim	ol3-rim	16	39.0854	40.53	0.037	0.2845	0.046	19.7105	0.0331	0.12	0.26	100.106	78.5656	226.47	195.841	2033.32	153210	943.02	2013.7	244396	275.77
R3738_1_ol4_1	ol4	17	39.3382	41.4359	0.0475	0.2439	0.0156	19.1879	0.0296	0.1375	0.2528	100.689	79.3788	202.523	251.417	1743.15	149148	1080.54	1957.94	249858	93.522	<231.25	608.29		5.77	80.19	8.6	216.51	1951.64	1230.13	215.71		14.4629	1.30853
R3738_1_ol4_2	ol4	18	39.3303	41.3639	0.0423	0.2502	0.0248	19.1901	0.0404	0.1429	0.2375	100.622	79.3485	276.417	223.894	1788.18	149165	1122.98	1839.44	249424	148.676	<191.13	<0.00		5.08	80.18	8.06	204.3	1826.48	1177.15	197.19		13.2196	1.22447
R3738_1_ol4_3	ol4	19	39.3641	41.166	0.0817	0.2544	0.0191	19.1247	0.0281	0.1343	0.2464	100.419	79.3258	192.26	432.438	1818.2	148656	1055.4	1908.37	248231	114.504	<249.37	188.78		5.36	82.46	14.92	215.37	1938.39	1202.13	224.06		15.0724	1.30394
R3738_1_ol4_4	ol4	20	39.276	41.232	0.0349	0.2476	0.016	19.2748	0.0285	0.1418	0.2387	100.49	79.2237	194.997	184.726	1769.6	149823	1114.34	1848.73	248629	95.92
R3738_1_ol4_5	ol4	21	39.2467	41.4497	0.0439	0.2448	0.0187	19.1767	0.0299	0.136	0.2449	100.591	79.3938	204.576	232.363	1749.59	149060	1068.76	1896.75	249942	112.107
R3738_1_ol5_3	ol5	24	39.3163	41.7203	0.039	0.2445	0.0172	18.9381	0.0314	0.1502	0.2355	100.692	79.7034	214.839	206.427	1747.44	147206	1180.35	1823.95	251573	103.114	48.67	34.23	1293.03	4.59	72.27	7.21	187.84	1637.39	1045.5	177.09		12.0301	1.11231
R3738_1_ol5_4	ol5	25	39.519	41.5463	0.0403	0.2484	0.0132	18.9905	0.0347	0.1406	0.2419	100.775	79.5909	237.417	213.308	1775.31	147613	1104.91	1873.52	250524	79.134
R3738_1_ol5_5	ol5	26	39.4702	41.4484	0.0421	0.2539	0.0151	18.9065	0.0333	0.1424	0.2397	100.552	79.6245	227.839	222.835	1814.62	146960	1119.05	1856.48	249934	90.5245
R3738_1_ol5_2	ol5	23	39.6141	41.5469	0.0736	0.2574	0.0161	18.6707	0.0416	0.1504	0.2523	100.623	79.8656	284.627	389.565	1839.64	145127	1181.92	1954.06	250528	96.5195	46.12	180.24	1300.38	4.56	69.23	7.81	195.52	1667.04	1178.32	194.34		13.391	1.14867
R3738_1_ol5_1	ol5	22	39.2942	41.3082	0.042	0.2627	0.0159	18.8797	0.042	0.1453	0.2272	100.217	79.5925	287.364	222.306	1877.52	146752	1141.84	1759.66	249088	95.3205	53.66	86.31	1379.21	5.08	73.83	8.53	221.08	1792.63	1267.67	202.05		13.7681	1.22154
R3738_1_ol5_rim	ol5-rim	27	39.0285	40.6389	0.0336	0.2921	0.0553	19.4595	0.0232	0.1268	0.2529	99.9108	78.8255	158.734	177.845	2087.64	151259	996.458	1958.71	245053	331.524
R3738_1_ol6_1	ol6	28	39.6179	42.63	0.1022	0.2192	0.0159	17.4856	0.0474	0.2046	0.2167	100.539	81.294	324.311	540.945	1566.62	135916	1607.85	1678.34	257059	95.3205	57.28	73.96	1139.71	4.24	66.87	8.62	255.05	1459.48	1550.23	171.54		12.6211	1.07381
R3738_1_ol6_2	ol6	29	39.6056	42.5904	0.1115	0.2321	0.0121	17.4506	0.0283	0.2075	0.2116	100.45	81.3103	193.629	590.169	1658.82	135644	1630.64	1638.84	256820	72.5395	54.3	80.59	1240.06	4.57	76.21	8.46	234.04	1553.68	1416.6	177.27		13.0688	1.14541
R3738_1_ol6_3	ol6	30	39.5074	42.5131	0.066	0.2314	0.0129	17.8125	0.0455	0.1951	0.2345	100.618	80.9684	311.311	349.338	1653.82	138457	1533.19	1816.2	256354	77.3355	48.88	152.81	991.68	3.57	56.24	7.26	214.38	1226.32	1293.45	145.99		10.5441	0.885707
R3738_1_ol6_4	ol6	31	39.3113	42.4612	0.0481	0.2195	0.0098	17.8399	0.0502	0.2111	0.2278	100.379	80.9259	343.468	254.593	1568.77	138670	1658.93	1764.31	256041	58.751
R3738_1_ol6_5	ol6	32	39.4984	42.6057	0.0473	0.2159	0.0183	17.6658	0.0358	0.2003	0.2062	100.494	81.1288	244.944	250.359	1543.04	137316	1574.06	1597.02	256912	109.709
R3738_1_ol7_1	ol7	38	39.3724	41.5221	0.0379	0.255	0.0152	19.2747	0.0272	0.1267	0.2628	100.894	79.3389	186.102	200.605	1822.49	149822	995.672	2035.39	250378	91.124	<363.02	593.85		5.62	104.01		190.16	1936.13	1066.28	235.83		15.7407	1.29228
R3738_1_ol7_2	ol7	39	39.2815	41.4654	0.0307	0.2618	0.0108	19.2334	0.038	0.1311	0.2554	100.708	79.3517	259.996	162.495	1871.08	149501	1030.25	1978.07	250036	64.746	<344.03	256.76		5.38	89.31	9.95	202.77	2024.38	1142.76	226.57		15.1551	1.35409
R3738_1_ol7_3	ol7	40	39.2237	41.5848	0.0405	0.2609	0.02	19.4508	0.0284	0.1247	0.2635	100.997	79.2143	194.313	214.367	1864.65	151191	979.955	2040.81	250756	119.9	<672.11	483.42		6.2	104.65		210.51	2139.67	1223.32	239.26		15.825	1.41521
R3738_1_ol7_4	ol7	41	39.2722	41.3563	0.1474	0.257	0.0211	19.3418	0.0282	0.1347	0.2596	100.818	79.2161	192.944	780.188	1836.78	150344	1058.54	2010.6	249378	126.495
R3738_1_ol8_1	ol8	43	39.5801	42.7545	0.0492	0.2194	0.0198	17.7828	0.0242	0.1895	0.2125	100.832	81.0811	165.576	260.416	1568.05	138226	1489.19	1645.81	257810	118.701	60.63	407.56	1150.82	4.28	90.41	8.54	191.6	1484.45	1379.79	171.73		12.4239	1.07393
R3738_1_ol8_2	ol8	44	39.7789	42.5922	0.0497	0.2244	0.0153	17.5284	0.0316	0.1815	0.217	100.619	81.2433	216.207	263.062	1603.79	136248	1426.32	1680.66	256831	91.7235	65.96	212.04	1174.66	4.56	95.88	8.96	220.37	1615.05	1515.47	186.56		13.6927	1.18537
R3738_1_ol8_3	ol8	45	39.623	42.5787	0.0545	0.2367	0.0172	17.643	0.0339	0.1853	0.2213	100.594	81.1389	231.944	288.469	1691.69	137139	1456.18	1713.97	256750	103.114	69.24	47.95	1215.02	4.39	90.28	8.96	224.2	1528.95	1526.84	178.59		13.0226	1.11489
R3738_1_ol8_4	ol8	46	39.4753	42.3852	0.0491	0.2353	0.0199	18.0608	0.0346	0.16	0.2427	100.663	80.7073	236.733	259.886	1681.69	140387	1257.36	1879.71	255583	119.3
R3738_1_ol8_5	ol8	47	39.8395	42.7655	0.0401	0.2311	0.0171	17.9955	0.028	0.1782	0.2213	101.316	80.902	191.576	212.249	1651.67	139879	1400.38	1713.97	257876	102.514

## Sheet: G50687
Hole, M.J., Gibson, S.A., and Morris, M.C., 2023, Slab window–related magmatism as a probe for pyroxenite heterogeneities in the upper mantle: Geology, https://doi.org/10.1130/G50687.1
